# Supplementary material for: Multi-Omics Analysis Reveals Flavor Differences Between Queshan And Yunong Black Pigs
Source: Research Square preprint supplement (doi:10.21203/rs.3.rs-7304887/v1), 2025-09-04
Supplement: Supplementary file 1 [file 90046d0b857ce409db2b94ff.docx]

**Supplementary Table 1** Ingredient composition of pig diets(%).

**Supplementary Table 2** FAs contents (μg/g) in LD of QS and YN.

**Supplementary Table 3** AAs contents (%) in LD of QS and YN.

**Supplementary Table 4** The KEGG enrichment analysis of differential VOCs.

**Supplementary Table 5** The ROAV results of VOCs.

**Supplementary Table 6** The KEGG enrichment analysis of up-regulated DEGs.

**Supplementary Table 7** The KEGG enrichment analysis of down-regulated DEGs.

**Supplementary Table 8** The number of lipids identified in QS and YN.

**Supplementary Table 9** The number and proportion of various types of DELs.

**Supplementary Table 10** The correlation analysis of DELs classification.

**S Table 1**

| nutritional ingredient | Compositions |
| --- | --- |
| Net Energy for Pigs (kcal/kg) | 2012.80 |
| Dry Matter (%) | 84.50 |
| Crude Protein (%) | 13.96 |
| Crude Fat (%) | 3.20 |
| Crude Fiber (%) | 2.42 |
| Crude Ash (%) | 2.39 |
| Digestible Lysine (%) | 0.53 |
| Digestible Arginine (%) | 0.94 |
| Digestible Histidine (%) | 0.40 |
| Digestible Isoleucine (%) | 0.55 |
| Digestible Leucine (%) | 1.25 |
| Digestible Methionine (%) | 0.25 |
| Methionine + Cystine (%) | 0.48 |
| Digestible Phenylalanine (%) | 0.92 |
| Digestible Threonine (%) | 0.50 |
| Digestible Tryptophan (%) | 0.18 |
| Digestible Valine (%) | 0.65 |

**S Table 2**

| Variety | | QS | YN | *P* |
| --- | --- | --- | --- | --- |
| Degree of saturation | FAs | Mean ± SD | Mean ± SD |
| SFAs | C12:0 | 21.44±0.08a | 12.88±0.26b | 0.000 |
| C16:0 | 4067.58±356.56a | 2240.72±378.96b | 0.004 |
| C18:0 | 2120.26±193.40a | 1001.40±141.91b | 0.001 |
| MUFAs | C16:1 | 473.57±46.16 | 395.91±65.86 | 0.170 |
| C17:1 | 30.73±2.93a | 7.63±0.82b | 0.003 |
| C18:1 | 4104.07±361.61a | 1574.33±285.28b | 0.001 |
| C20:1 | 188.37±15.63a | 45.28±7.83b | 0.001 |
| C22:1 | 3.22±0.49a | 0.77±0.17b | 0.008 |
| C24:1 | 2.86±0.18a | 1.96±0.08b | 0.005 |
| PUFAs | C18:2 | 632.22±56.13a | 145.99±8.39b | 0.000 |
| C18:3(n6) | 7.39±0.30a | 2.13±0.39b | 0.000 |
| C18:3(n3) | 40.88±0.28a | 7.28±1.89b | 0.000 |
| C20:4 | 9.21±0.93a | 1.69±0.21b | 0.000 |
| C20:5 | 1.54±0.30b | 2.18±0.24a | 0.043 |
| C22:6 | 3.63±0.42a | 2.63±0.12b | 0.017 |

**S Table 3**

| Name | QS | YN | *P* |
| --- | --- | --- | --- |
| Mean ± SD | Mean ± SD |
| Cystine (Cys) | 0.61±0.06a | 0.02±0.00b | 0.000 |
| Isoleucine (Lle) | 0.55±0.04b | 1.26±0.08a | 0.000 |
| Proline (Pro) | 2.08±0.18a | 0.29±0.02b | 0.000 |
| Serine (Ser) | 0.24±0.03a | 0.13±0.01b | 0.000 |
| Lysine (Lys) | 0.06±0.02b | 0.14±0.02a | 0.001 |
| Threonine (Thr) | 0.45±0.00a | 0.34±0.02b | 0.001 |
| Alanine (Ala) | 0.26±0.02b | 0.32±0.02a | 0.003 |
| Tyrosine (Tyr) | 0.24±0.02b | 0.29±0.02a | 0.015 |
| Arginine (Arg) | 6.22±0.22a | 5.60±0.29b | 0.028 |
| Histidine (His) | 0.15±0.07b | 0.27±0.06a | 0.036 |
| Glutamate (Glu) | 0.17±0.01 | 0.18±0.01 | 0.134 |
| Aspartic Acid (Asp) | 0.01±0.00 | 0.01±0.01 | 0.182 |
| Valine (Val) | 0.23±0.03 | 0.25±0.01 | 0.209 |
| Methionine (Met) | 0.13±0.02 | 0.12±0.02 | 0.331 |
| Glycine (Gly) | 0.35±0.05 | 0.35±0.04 | 0.824 |
| Leucine (Leu) | 0.20±0.02 | 0.20±0.03 | 0.891 |
| Essential AAs | 1.65±0.35b | 2.49±0.28a | 0.010 |
| Sweet AAs | 3.32±0.47a | 1.48±0.19b | 0.000 |
| Total AAs | 12.03±0.30a | 9.68±0.60b | 0.002 |
| Bitter AAs | 7.52±0.13 | 7.70±0.46 | 0.552 |
| Umami AAs | 1.34±0.10b | 2.12±0.13a | 0.000 |

**S Table 4**

| Pathway | Pvalue | Qvalue | Genes |
| --- | --- | --- | --- |
| Fatty acid biosynthesis | 0.095238 | 0.289634 | 1-Hexanol |
| Tyrosine metabolism | 0.095238 | 0.289634 | Phenol |
| Ethylbenzene degradation | 0.095238 | 0.289634 | Ethylbenzene |
| Degradation of aromatic compounds | 0.121951 | 0.289634 | Phenol;Propanal;Ethylbenzene |
| Metabolic pathways | 0.133566 | 0.289634 | Phenol; Propanal; Ethylbenzene;1-Hexanol |
| Benzoate degradation | 0.183508 | 0.289634 | Phenol |
| Aminobenzoate degradation | 0.183508 | 0.289634 | Phenol |
| Xylene degradation | 0.265157 | 0.289634 | Propanal |
| Propanoate metabolism | 0.265157 | 0.289634 | Propanal |
| Protein digestion and absorption | 0.265157 | 0.289634 | Phenol |
| Chemical carcinogenesis - reactive oxygen species | 0.265157 | 0.289634 | Phenol |
| Microbial metabolism in diverse environments | 0.267355 | 0.289634 | Phenol;Propanal;Ethylbenzene |
| Chlorocyclohexane and chlorobenzene degradation | 0.340525 | 0.340525 | Phenol |

**S Table 5**

| Name | QS_ROAV | YN_ROAV |
| --- | --- | --- |
| 2,3-Butanedione | 564.7401202 | 81.64343947 |
| 2-Nonenal, (E)- | 100 | 100 |
| Heptanal | 92.72906426 | 71.44017957 |
| Furan, 2-pentyl- | 22.66498288 | 33.47742296 |
| Butanal, 2-methyl- | 20.50997652 | 11.70466787 |
| 2-Octenal, (E)- | 20.3782117 | 23.82596218 |
| 1-Octen-3-one | 14.03857637 | 14.01825488 |
| 2-Undecanone | 2.364541843 | 0.684459527 |
| 1-Hexanol, 2-ethyl- | 1.528815013 | 0.766277559 |
| Pentanal | 1.243553461 | 1.085223019 |
| Propanal, 2-methyl- | 0.942991192 | 0.356325819 |
| Acetic acid, butyl ester | 0.249619685 | 0.06866422 |
| Nonanal | 0.227827574 | 0.157895911 |
| 2-Heptanone | 0.212108842 | 0.196997459 |
| Butanal | 0.172133315 | 0.09232399 |
| 1-Octanol | 0.15964711 | 0.100161491 |
| Octanal | 0.100236045 | 0.075201983 |
| 1-Hexanol | 0.06948682 | 0.060697479 |
| Hexanal | 0.054935321 | 0.039905124 |
| Naphthalene | 0.054033734 | 0.005953182 |
| 1-Heptanol | 0.03972323 | 0.030839181 |
| 1-Octen-3-ol | 0.0380888 | 0.022761558 |
| a-Pinene | 0.03751976 | 0.011116558 |
| 1-Pentanol | 0.03446799 | 0.041084533 |
| Butanoic acid, ethyl ester | 0.033378275 | 0.010704296 |
| Pyrazine, trimethyl- | 0.032227125 | 0.005873978 |
| 2,6-Nonadienal, (E, Z)- | 0.028972376 | 0.059147822 |
| Disulfide, dimethyl | 0.028477844 | 0.014384049 |
| Phenol | 0.026533828 | 0.000802651 |
| Toluene | 0.021723294 | 0.009786345 |
| Butanoic acid, 2-methyl-, ethyl ester | 0.021656243 | 0.001689807 |
| Dimethyl trisulfide | 0.019905456 | 0.011042512 |
| Hexadecanoic acid, ethyl ester | 0.018877292 | 0.011378406 |
| Propanal | 0.016592469 | 0.027738273 |
| Methional | 0.013735851 | 0.010267964 |
| 2,4-Decadienal, (E, E)- | 0.008355545 | 0.012590524 |
| Methyl methacrylate | 0.008290165 | 9.65011E-06 |
| Butanoic acid, 3-methyl-, ethyl ester | 0.008111771 | 0.000183996 |
| 1-Butanol | 0.006948601 | 0.004774362 |
| Hexanoic acid, ethyl ester | 0.006754269 | 0.002136187 |
| 2-Propenal | 0.006378297 | 3.75282E-05 |
| Phenol, 2-methoxy- | 0.005379026 | 1.46849E-05 |
| Ethyl Acetate | 0.005273422 | 0.001834513 |
| 2-Butanone | 0.005024923 | 0.000653691 |
| Propanoic acid, 2-methyl-, ethyl ester | 0.004450722 | 0.000410806 |
| Furan, 2-ethyl- | 0.003795497 | 0.010822006 |
| Phenol, 4-ethyl-2-methoxy- | 0.003214003 | 1.95799E-05 |
| 1-Butanol, 3-methyl- | 0.00256376 | 7.99417E-05 |
| Pyridine, 2-methyl- | 0.002176699 | 0.000962347 |
| p-Cymene | 0.002105025 | 0.000606746 |
| Benzene, (1-methylethyl)- | 0.001850978 | 0.000714607 |
| Acetone | 0.001845636 | 0.001412233 |
| 2,3-Butanediol | 0.001561156 | 3.00226E-05 |
| a-Terpineol | 0.001518784 | 0.000135101 |
| 1-Butanamine, N-butyl- | 0.001211297 | 8.15831E-05 |
| 2-Nonanone | 0.001156653 | 0.00050402 |
| 5-Hepten-2-one, 6-methyl- | 0.001143846 | 0.00022311 |
| 2-Propenoic acid, butyl ester | 0.001032588 | 0.000465867 |
| Pyridine | 0.000861804 | 1.42298E-05 |
| sec-Butyl acetate | 0.000822094 | 0.000556294 |
| Phenol, 3-methyl- | 0.000754198 | 6.75507E-06 |
| 1-Methoxy-2-propyl acetate | 0.000726034 | 4.65867E-05 |
| Phenol, 2-methyl- | 0.000721836 | 4.35811E-06 |
| 2-Hexanone, 5-methyl- | 0.000676684 | 0.000314526 |
| Octanoic acid, ethyl ester | 0.000663539 | 0.000322704 |
| Linalool | 0.000532956 | 0.000120534 |
| Pentanoic acid, ethyl ester | 0.000515301 | 0.000176743 |
| Creosol | 0.000505351 | 6.4334E-06 |
| 2-Butanol | 0.000460262 | 3.1419E-06 |
| 1-Propanol, 2-methyl- | 0.000431496 | 0.000245452 |
| p-Cresol | 0.000392773 | 0.000133368 |
| Formamide, N, N-dimethyl- | 0.000382593 | 0.00034843 |
| Naphthalene, 2-methyl- | 0.0003037 | 0.000794885 |
| Butyrolactone | 0.000249328 | 8.72178E-05 |
| Octane | 0.000247233 | 0.000104084 |
| Pentanoic acid, 4-methyl-, ethyl ester | 0.000235091 | 0.000229106 |
| a-Methylstyrene | 0.000229519 | 0.000208372 |
| 1-Octene | 0.000209553 | 0.008590459 |
| 2,6,10-Dodecatrien-1-ol, 3,7,11-trimethyl- | 0.000191494 | 2.43541E-05 |
| ?-Dodecalactone | 0.000179985 | 8.24777E-05 |
| Ethanol, 2-butoxy- | 0.000179275 | 6.21606E-05 |
| Trichloromethane | 0.000166871 | 0.000124863 |
| Isopropyl Alcohol | 0.000132802 | 0.00016578 |
| Ethanol | 0.000127382 | 9.0739E-05 |
| Methyl vinyl ketone | 0.000123753 | 7.42501E-05 |
| Benzene | 9.09732E-05 | 5.29541E-05 |
| 2(3H)-Furanone, 5-heptyldihydro- | 8.91686E-05 | 3.2167E-05 |
| Pyridine, 3-(1-methyl-2-pyrrolidinyl)-, (S)- | 8.37262E-05 | 1.36466E-05 |
| n-Propyl acetate | 4.95845E-05 | 2.81461E-06 |
| 2-Heptanol | 4.76815E-05 | 3.30235E-05 |
| 2-Propanol, 2-methyl- | 3.92656E-05 | 2.11852E-05 |
| Benzene, 1,2-dichloro- | 3.90689E-05 | 1.37883E-05 |
| 2-Hexenal, (E)- | 3.31596E-05 | 7.92438E-05 |
| Decanoic acid, ethyl ester | 3.12671E-05 | 4.43154E-05 |
| Thiazole | 3.0048E-05 | 1.13135E-05 |
| Acetic acid, pentyl ester | 2.99362E-05 | 3.84259E-05 |
| 2-Methoxy-4-vinylphenol | 2.75001E-05 | 3.37754E-06 |
| 2-Nonanol | 2.35425E-05 | 2.70203E-06 |
| Cyclohexanone | 2.21665E-05 | 1.43684E-05 |
| Tetradecanoic acid, ethyl ester | 2.05479E-05 | 1.66697E-05 |
| Benzene, chloro- | 1.79392E-05 | 9.73142E-06 |
| Benzene, 1,4-dichloro- | 1.77566E-05 | 5.15016E-06 |
| Nonanoic acid, ethyl ester | 1.04338E-05 | 3.72016E-06 |
| Pentanoic acid, 2-hydroxy-4-methyl-, ethyl ester | 9.93151E-06 | 1.05373E-05 |
| Nonane | 9.38486E-06 | 4.65217E-06 |
| 2H-Pyran-2-one, tetrahydro-6-propyl- | 8.85264E-06 | 3.00686E-06 |
| Ethane, 1,1-diethoxy- | 7.64399E-06 | 1.87902E-07 |
| 2-Pentanone | 7.48404E-06 | 0.000198829 |
| Dodecanoic acid, ethyl ester | 7.44478E-06 | 6.81735E-06 |
| Thiophene | 7.4415E-06 | 5.06246E-06 |
| Ethane, 1,1,2,2-tetrachloro- | 7.18612E-06 | 3.11521E-06 |
| Tetrachloroethylene | 6.84058E-06 | 3.52411E-06 |
| 1-Decene | 6.36593E-06 | 2.78954E-06 |
| Thiophene, 3-methyl- | 5.8414E-06 | 2.59427E-06 |
| Acetonitrile | 5.25101E-06 | 2.19114E-06 |
| 2-Propanol, 1-methoxy- | 3.13733E-06 | 1.88447E-05 |
| Benzothiazole | 3.08471E-06 | 1.35836E-06 |
| 2-Propenoic acid, 2-methyl- | 2.46389E-06 | 1.58731E-06 |
| Propanoic acid, 2-hydroxy-, ethyl ester | 2.44932E-06 | 1.14083E-06 |
| Tetrahydrofuran | 2.27775E-06 | 2.91077E-05 |
| Cyclohexane, methyl- | 2.11675E-06 | 2.87528E-06 |
| 2H-Pyran-2-one, tetrahydro-6-pentyl- | 2.09553E-06 | 7.55251E-06 |
| Heptanoic acid, ethyl ester | 1.81115E-06 | 5.79738E-07 |
| Propanoic acid, ethyl ester | 1.66192E-06 | 4.85334E-07 |
| Cyclohexene | 1.16418E-06 | 7.95082E-07 |
| Ethyl formate | 9.88473E-07 | 5.00376E-08 |
| 2-Hexen-1-ol, (E)- | 9.03636E-07 | 1.96985E-06 |
| Ethane, 1,2-dichloro- | 7.56333E-07 | 4.96429E-07 |
| Boron trifluoride | 6.90713E-07 | 9.00677E-08 |
| 2-Furanmethanol | 6.6462E-07 | 1.68877E-08 |
| Pentane, 2-methyl- | 4.91909E-07 | 5.55603E-07 |
| γ-Terpinene | 1.26845E-07 | 5.9537E-08 |
| Propene | 1.23532E-07 | 3.63184E-07 |
| Methane, nitro- | 1.09865E-07 | 3.19657E-08 |
| Pantolactone | 1.04777E-07 | 2.33909E-07 |
| Phenol, 2,6-dimethoxy- | 2.51046E-08 | 2.34673E-09 |
| Methyl formate | 3.12766E-09 | 6.27462E-09 |

**S Table 6**

| ID | Descrption | Pvalue | Qvalue |
| --- | --- | --- | --- |
| ko05417 | Lipid and atherosclerosis | 2.06E-05 | 0.006559 |
| ko04141 | Protein processing in endoplasmic reticulum | 5.51E-05 | 0.008767 |
| ko04137 | Mitophagy - animal | 0.000751 | 0.079575 |
| ko05131 | Shigellosis | 0.001815 | 0.122932 |
| ko05134 | Legionellosis | 0.001933 | 0.122932 |
| ko05205 | Proteoglycans in cancer | 0.002558 | 0.135555 |
| ko01524 | Platinum drug resistance | 0.003238 | 0.147098 |
| ko04111 | Cell cycle - yeast | 0.004841 | 0.192425 |
| ko05142 | Chagas disease | 0.005489 | 0.193946 |
| ko04657 | IL-17 signaling pathway | 0.009862 | 0.313624 |
| ko04144 | Endocytosis | 0.017365 | 0.39429 |
| ko04530 | Tight junction | 0.017537 | 0.39429 |
| ko04361 | Axon regeneration | 0.018125 | 0.39429 |
| ko05210 | Colorectal cancer | 0.018175 | 0.39429 |
| ko05135 | Yersinia infection | 0.020512 | 0.39429 |
| ko04710 | Circadian rhythm | 0.021899 | 0.39429 |
| ko04612 | Antigen processing and presentation | 0.022977 | 0.39429 |
| ko03040 | Spliceosome | 0.023054 | 0.39429 |
| ko05132 | Salmonella infection | 0.023558 | 0.39429 |
| ko04550 | Signaling pathways regulating pluripotency of stem cells | 0.025492 | 0.405325 |
| ko04620 | Toll-like receptor signaling pathway | 0.027048 | 0.406415 |
| ko04621 | NOD-like receptor signaling pathway | 0.028117 | 0.406415 |
| ko05222 | Small cell lung cancer | 0.03062 | 0.419283 |
| ko04624 | Toll and Imd signaling pathway | 0.032961 | 0.419283 |
| ko04071 | Sphingolipid signaling pathway | 0.032963 | 0.419283 |
| ko04730 | Long-term depression | 0.035267 | 0.431337 |
| ko03013 | Nucleocytoplasmic transport | 0.038686 | 0.439367 |
| ko04668 | TNF signaling pathway | 0.038686 | 0.439367 |
| ko04391 | Hippo signaling pathway - fly | 0.041063 | 0.447021 |
| ko03060 | Protein export | 0.043866 | 0.447021 |
| ko04918 | Thyroid hormone synthesis | 0.046819 | 0.447021 |
| ko04210 | Apoptosis | 0.048177 | 0.447021 |
| ko04750 | Inflammatory mediator regulation of TRP channels | 0.048232 | 0.447021 |
| ko04659 | Th17 cell differentiation | 0.050192 | 0.447021 |
| ko04024 | cAMP signaling pathway | 0.05045 | 0.447021 |
| ko05164 | Influenza A | 0.052298 | 0.447021 |
| ko04113 | Meiosis - yeast | 0.05301 | 0.447021 |
| ko04214 | Apoptosis - fly | 0.05441 | 0.447021 |
| ko04217 | Necroptosis | 0.056229 | 0.447021 |
| ko04728 | Dopaminergic synapse | 0.056229 | 0.447021 |
| ko04914 | Progesterone-mediated oocyte maturation | 0.059174 | 0.458962 |
| ko05207 | Chemical carcinogenesis - receptor activation | 0.064255 | 0.462895 |
| ko04614 | Renin-angiotensin system | 0.068065 | 0.462895 |
| ko05170 | Human immunodeficiency virus 1 infection | 0.068825 | 0.462895 |
| ko04923 | Regulation of lipolysis in adipocytes | 0.070226 | 0.462895 |
| ko00250 | Alanine, aspartate and glutamate metabolism | 0.0725 | 0.462895 |
| ko05130 | Pathogenic Escherichia coli infection | 0.076649 | 0.462895 |
| ko05160 | Hepatitis C | 0.078459 | 0.462895 |
| ko04114 | Oocyte meiosis | 0.078766 | 0.462895 |
| ko04622 | RIG-I-like receptor signaling pathway | 0.082691 | 0.462895 |
| ko05223 | Non-small cell lung cancer | 0.082857 | 0.462895 |
| ko04064 | NF-kappa B signaling pathway | 0.085607 | 0.462895 |
| ko04390 | Hippo signaling pathway | 0.08985 | 0.462895 |
| ko04068 | FoxO signaling pathway | 0.091411 | 0.462895 |
| ko04212 | Longevity regulating pathway - worm | 0.092979 | 0.462895 |
| ko04350 | TGF-beta signaling pathway | 0.092979 | 0.462895 |
| ko05212 | Pancreatic cancer | 0.092979 | 0.462895 |
| ko04070 | Phosphatidylinositol signaling system | 0.093181 | 0.462895 |
| ko04510 | Focal adhesion | 0.09492 | 0.462895 |
| ko05200 | Pathways in cancer | 0.099477 | 0.462895 |
| ko00523 | Polyketide sugar unit biosynthesis | 0.100026 | 0.462895 |
| ko00525 | Acarbose and validamycin biosynthesis | 0.100026 | 0.462895 |
| ko01055 | Biosynthesis of vancomycin group antibiotics | 0.100026 | 0.462895 |
| ko04112 | Cell cycle - Caulobacter | 0.100026 | 0.462895 |
| ko04713 | Circadian entrainment | 0.100864 | 0.462895 |
| ko04724 | Glutamatergic synapse | 0.101548 | 0.462895 |
| ko04720 | Long-term potentiation | 0.105317 | 0.462895 |
| ko05161 | Hepatitis B | 0.107142 | 0.462895 |
| ko04971 | Gastric acid secretion | 0.109182 | 0.462895 |
| ko05213 | Endometrial cancer | 0.109182 | 0.462895 |
| ko04933 | AGE-RAGE signaling pathway in diabetic complications | 0.109487 | 0.462895 |
| ko05145 | Toxoplasmosis | 0.109487 | 0.462895 |
| ko04310 | Wnt signaling pathway | 0.110223 | 0.462895 |
| ko03018 | RNA degradation | 0.110629 | 0.462895 |
| ko04012 | ErbB signaling pathway | 0.110629 | 0.462895 |
| ko04912 | GnRH signaling pathway | 0.110629 | 0.462895 |
| ko05162 | Measles | 0.115872 | 0.478534 |
| ko00564 | Glycerophospholipid metabolism | 0.11999 | 0.489191 |
| ko04120 | Ubiquitin mediated proteolysis | 0.129199 | 0.51207 |
| ko00561 | Glycerolipid metabolism | 0.130813 | 0.51207 |
| ko00480 | Glutathione metabolism | 0.13254 | 0.51207 |
| ko05143 | African trypanosomiasis | 0.13254 | 0.51207 |
| ko00601 | Glycosphingolipid biosynthesis - lacto and neolacto series | 0.133654 | 0.51207 |
| ko04270 | Vascular smooth muscle contraction | 0.136789 | 0.517845 |
| ko04915 | Estrogen signaling pathway | 0.1422 | 0.531996 |
| ko04929 | GnRH secretion | 0.144572 | 0.534579 |
| ko04626 | Plant-pathogen interaction | 0.149631 | 0.543545 |
| ko04611 | Platelet activation | 0.151628 | 0.543545 |
| ko04925 | Aldosterone synthesis and secretion | 0.154539 | 0.543545 |
| ko05418 | Fluid shear stress and atherosclerosis | 0.155486 | 0.543545 |
| ko04973 | Carbohydrate digestion and absorption | 0.157837 | 0.543545 |
| ko05206 | MicroRNAs in cancer | 0.158449 | 0.543545 |
| ko04924 | Renin secretion | 0.158961 | 0.543545 |
| ko05168 | Herpes simplex virus 1 infection | 0.164892 | 0.545479 |
| ko03015 | mRNA surveillance pathway | 0.166659 | 0.545479 |
| ko05100 | Bacterial invasion of epithelial cells | 0.166659 | 0.545479 |
| ko04911 | Insulin secretion | 0.170856 | 0.545479 |
| ko05220 | Chronic myeloid leukemia | 0.170856 | 0.545479 |
| ko04130 | SNARE interactions in vesicular transport | 0.171534 | 0.545479 |
| ko04960 | Aldosterone-regulated sodium reabsorption | 0.171534 | 0.545479 |
| ko05166 | Human T-cell leukemia virus 1 infection | 0.18013 | 0.567143 |
| ko04928 | Parathyroid hormone synthesis, secretion and action | 0.185141 | 0.575637 |
| ko02024 | Quorum sensing | 0.186857 | 0.575637 |
| ko00780 | Biotin metabolism | 0.190069 | 0.575637 |
| ko03070 | Bacterial secretion system | 0.190069 | 0.575637 |
| ko04940 | Type I diabetes mellitus | 0.192363 | 0.57709 |
| ko04380 | Osteoclast differentiation | 0.209787 | 0.606341 |
| ko04320 | Dorso-ventral axis formation | 0.210587 | 0.606341 |
| ko04964 | Proximal tubule bicarbonate reclamation | 0.210587 | 0.606341 |
| ko04920 | Adipocytokine signaling pathway | 0.213779 | 0.606341 |
| ko05216 | Thyroid cancer | 0.213931 | 0.606341 |
| ko04921 | Oxytocin signaling pathway | 0.214448 | 0.606341 |
| ko05202 | Transcriptional misregulation in cancer | 0.215461 | 0.606341 |
| ko04934 | Cushing syndrome | 0.225861 | 0.62581 |
| ko04261 | Adrenergic signaling in cardiomyocytes | 0.226315 | 0.62581 |
| ko05323 | Rheumatoid arthritis | 0.2289 | 0.627501 |
| ko04936 | Alcoholic liver disease | 0.237014 | 0.63864 |
| ko05167 | Kaposi sarcoma-associated herpesvirus infection | 0.237386 | 0.63864 |
| ko05032 | Morphine addiction | 0.238988 | 0.63864 |
| ko04725 | Cholinergic synapse | 0.247454 | 0.650521 |
| ko05226 | Gastric cancer | 0.249383 | 0.650521 |
| ko04722 | Neurotrophin signaling pathway | 0.249571 | 0.650521 |
| ko04810 | Regulation of actin cytoskeleton | 0.254523 | 0.658035 |
| ko04010 | MAPK signaling pathway | 0.256745 | 0.658426 |
| ko02010 | ABC transporters | 0.258831 | 0.658467 |
| ko04215 | Apoptosis - multiple species | 0.266139 | 0.666033 |
| ko05332 | Graft-versus-host disease | 0.266139 | 0.666033 |
| ko00470 | D-Amino acid metabolism | 0.271124 | 0.666033 |
| ko04013 | MAPK signaling pathway - fly | 0.273942 | 0.666033 |
| ko04970 | Salivary secretion | 0.273942 | 0.666033 |
| ko04371 | Apelin signaling pathway | 0.275345 | 0.666033 |
| ko00230 | Purine metabolism | 0.276467 | 0.666033 |
| ko04726 | Serotonergic synapse | 0.291861 | 0.673594 |
| ko05231 | Choline metabolism in cancer | 0.291943 | 0.673594 |
| ko04360 | Axon guidance | 0.292259 | 0.673594 |
| ko04974 | Protein digestion and absorption | 0.292558 | 0.673594 |
| ko05146 | Amoebiasis | 0.292558 | 0.673594 |
| ko05330 | Allograft rejection | 0.294555 | 0.673594 |
| ko04140 | Autophagy - animal | 0.298802 | 0.673594 |
| ko04072 | Phospholipase D signaling pathway | 0.30188 | 0.673594 |
| ko04152 | AMPK signaling pathway | 0.30188 | 0.673594 |
| ko00670 | One carbon pool by folate | 0.302752 | 0.673594 |
| ko04935 | Growth hormone synthesis, secretion and action | 0.304725 | 0.673594 |
| ko04670 | Leukocyte transendothelial migration | 0.307201 | 0.673594 |
| ko00330 | Arginine and proline metabolism | 0.30926 | 0.673594 |
| ko04213 | Longevity regulating pathway - multiple species | 0.30926 | 0.673594 |
| ko04022 | cGMP-PKG signaling pathway | 0.319933 | 0.687843 |
| ko05163 | Human cytomegalovirus infection | 0.322371 | 0.687843 |
| ko05320 | Autoimmune thyroid disease | 0.323145 | 0.687843 |
| ko04910 | Insulin signaling pathway | 0.324454 | 0.687843 |
| ko04514 | Cell adhesion molecules | 0.333621 | 0.702593 |
| ko05017 | Spinocerebellar ataxia | 0.342782 | 0.716157 |
| ko01521 | EGFR tyrosine kinase inhibitor resistance | 0.346818 | 0.716157 |
| ko04540 | Gap junction | 0.346818 | 0.716157 |
| ko04930 | Type II diabetes mellitus | 0.35265 | 0.721339 |
| ko04660 | T cell receptor signaling pathway | 0.353865 | 0.721339 |
| ko05014 | Amyotrophic lateral sclerosis | 0.367827 | 0.745026 |
| ko05140 | Leishmaniasis | 0.371086 | 0.746314 |
| ko04978 | Mineral absorption | 0.376356 | 0.746314 |
| ko04211 | Longevity regulating pathway | 0.376616 | 0.746314 |
| ko05204 | Chemical carcinogenesis - DNA adducts | 0.378905 | 0.746314 |
| ko05219 | Bladder cancer | 0.380198 | 0.746314 |
| ko00562 | Inositol phosphate metabolism | 0.383993 | 0.747377 |
| ko04066 | HIF-1 signaling pathway | 0.38544 | 0.747377 |
| ko00440 | Phosphonate and phosphinate metabolism | 0.409761 | 0.786838 |
| ko05215 | Prostate cancer | 0.410739 | 0.786838 |
| ko04977 | Vitamin digestion and absorption | 0.415698 | 0.791569 |
| ko04927 | Cortisol synthesis and secretion | 0.42345 | 0.796787 |
| ko05321 | Inflammatory bowel disease | 0.42345 | 0.796787 |
| ko04666 | Fc gamma R-mediated phagocytosis | 0.427776 | 0.800192 |
| ko04110 | Cell cycle | 0.432964 | 0.800505 |
| ko05214 | Glioma | 0.432978 | 0.800505 |
| ko04650 | Natural killer cell mediated cytotoxicity | 0.439693 | 0.808222 |
| ko04919 | Thyroid hormone signaling pathway | 0.452003 | 0.826074 |
| ko04145 | Phagosome | 0.46676 | 0.835547 |
| ko04931 | Insulin resistance | 0.46676 | 0.835547 |
| ko00541 | O-Antigen nucleotide sugar biosynthesis | 0.468875 | 0.835547 |
| ko04711 | Circadian rhythm - fly | 0.468875 | 0.835547 |
| ko04062 | Chemokine signaling pathway | 0.470323 | 0.835547 |
| ko04640 | Hematopoietic cell lineage | 0.47633 | 0.841515 |
| ko05208 | Chemical carcinogenesis - reactive oxygen species | 0.48514 | 0.848749 |
| ko00340 | Histidine metabolism | 0.485762 | 0.848749 |
| ko04060 | Cytokine-cytokine receptor interaction | 0.509508 | 0.878317 |
| ko04630 | JAK-STAT signaling pathway | 0.510971 | 0.878317 |
| ko04926 | Relaxin signaling pathway | 0.510971 | 0.878317 |
| ko04745 | Phototransduction - fly | 0.518786 | 0.88309 |
| ko00521 | Streptomycin biosynthesis | 0.522082 | 0.88309 |
| ko00603 | Glycosphingolipid biosynthesis - globo and isoglobo series | 0.522082 | 0.88309 |
| ko04218 | Cellular senescence | 0.524855 | 0.88309 |
| ko05165 | Human papillomavirus infection | 0.528777 | 0.88333 |
| ko03320 | PPAR signaling pathway | 0.532503 | 0.88333 |
| ko05171 | Coronavirus disease - COVID-19 | 0.534292 | 0.88333 |
| ko05133 | Pertussis | 0.536109 | 0.88333 |
| ko04625 | C-type lectin receptor signaling pathway | 0.547209 | 0.883858 |
| ko05235 | PD-L1 expression and PD-1 checkpoint pathway in cancer | 0.547209 | 0.883858 |
| ko03430 | Mismatch repair | 0.550367 | 0.883858 |
| ko03008 | Ribosome biogenesis in eukaryotes | 0.551494 | 0.883858 |
| ko04972 | Pancreatic secretion | 0.551494 | 0.883858 |
| ko04932 | Non-alcoholic fatty liver disease | 0.55311 | 0.883858 |
| ko04917 | Prolactin signaling pathway | 0.557334 | 0.883858 |
| ko04015 | Rap1 signaling pathway | 0.558665 | 0.883858 |
| ko05203 | Viral carcinogenesis | 0.563793 | 0.886554 |
| ko00514 | Other types of O-glycan biosynthesis | 0.565945 | 0.886554 |
| ko04512 | ECM-receptor interaction | 0.570105 | 0.888285 |
| ko05218 | Melanoma | 0.578028 | 0.888285 |
| ko00760 | Nicotinate and nicotinamide metabolism | 0.580463 | 0.888285 |
| ko00980 | Metabolism of xenobiotics by cytochrome P450 | 0.580463 | 0.888285 |
| ko01522 | Endocrine resistance | 0.581016 | 0.888285 |
| ko05022 | Pathways of neurodegeneration - multiple diseases | 0.584907 | 0.889955 |
| ko03460 | Fanconi anemia pathway | 0.589644 | 0.892889 |
| ko04913 | Ovarian steroidogenesis | 0.609053 | 0.89695 |
| ko00270 | Cysteine and methionine metabolism | 0.612496 | 0.89695 |
| ko04370 | VEGF signaling pathway | 0.612496 | 0.89695 |
| ko05144 | Malaria | 0.612496 | 0.89695 |
| ko00910 | Nitrogen metabolism | 0.613073 | 0.89695 |
| ko02020 | Two-component system | 0.613073 | 0.89695 |
| ko04016 | MAPK signaling pathway - plant | 0.613073 | 0.89695 |
| ko04520 | Adherens junction | 0.617713 | 0.89695 |
| ko05120 | Epithelial cell signaling in Helicobacter pylori infection | 0.617713 | 0.89695 |
| ko05225 | Hepatocellular carcinoma | 0.620531 | 0.89695 |
| ko00140 | Steroid hormone biosynthesis | 0.636139 | 0.903056 |
| ko00512 | Mucin type O-glycan biosynthesis | 0.636139 | 0.903056 |
| ko04662 | B cell receptor signaling pathway | 0.63666 | 0.903056 |
| ko04727 | GABAergic synapse | 0.63666 | 0.903056 |
| ko04151 | PI3K-Akt signaling pathway | 0.638955 | 0.903056 |
| ko00450 | Selenocompound metabolism | 0.651864 | 0.911911 |
| ko04961 | Endocrine and other factor-regulated calcium reabsorption | 0.655584 | 0.911911 |
| ko05322 | Systemic lupus erythematosus | 0.655584 | 0.911911 |
| ko04138 | Autophagy - yeast | 0.65669 | 0.911911 |
| ko04150 | mTOR signaling pathway | 0.670452 | 0.926973 |
| ko05169 | Epstein-Barr virus infection | 0.685619 | 0.941356 |
| ko00563 | Glycosylphosphatidylinositol (GPI)-anchor biosynthesis | 0.686776 | 0.941356 |
| ko05012 | Parkinson disease | 0.696038 | 0.949958 |
| ko04742 | Taste transduction | 0.708563 | 0.960417 |
| ko05415 | Diabetic cardiomyopathy | 0.709742 | 0.960417 |
| ko04916 | Melanogenesis | 0.717361 | 0.960768 |
| ko00061 | Fatty acid biosynthesis | 0.718194 | 0.960768 |
| ko05230 | Central carbon metabolism in cancer | 0.721973 | 0.960768 |
| ko05010 | Alzheimer disease | 0.724622 | 0.960768 |
| ko04979 | Cholesterol metabolism | 0.72988 | 0.960768 |
| ko04115 | p53 signaling pathway | 0.73115 | 0.960768 |
| ko04976 | Bile secretion | 0.73115 | 0.960768 |
| ko04260 | Cardiac muscle contraction | 0.737127 | 0.964635 |
| ko04723 | Retrograde endocannabinoid signaling | 0.740699 | 0.965337 |
| ko05211 | Renal cell carcinoma | 0.747868 | 0.970702 |
| ko00310 | Lysine degradation | 0.763746 | 0.973711 |
| ko00240 | Pyrimidine metabolism | 0.768558 | 0.973711 |
| ko00380 | Tryptophan metabolism | 0.768558 | 0.973711 |
| ko00565 | Ether lipid metabolism | 0.768558 | 0.973711 |
| ko04216 | Ferroptosis | 0.768558 | 0.973711 |
| ko04672 | Intestinal immune network for IgA production | 0.768558 | 0.973711 |
| ko00520 | Amino sugar and nucleotide sugar metabolism | 0.778804 | 0.978892 |
| ko04664 | Fc epsilon RI signaling pathway | 0.778804 | 0.978892 |
| ko00590 | Arachidonic acid metabolism | 0.78603 | 0.980225 |
| ko04740 | Olfactory transduction | 0.78603 | 0.980225 |
| ko00100 | Steroid biosynthesis | 0.794808 | 0.987301 |
| ko04340 | Hedgehog signaling pathway | 0.802332 | 0.992769 |
| ko04721 | Synaptic vesicle cycle | 0.806554 | 0.994125 |
| ko00220 | Arginine biosynthesis | 0.815411 | 0.995348 |
| ko05310 | Asthma | 0.815411 | 0.995348 |
| ko04061 | Viral protein interaction with cytokine and cytokine receptor | 0.819296 | 0.995348 |
| ko05110 | Vibrio cholerae infection | 0.831664 | 0.995348 |
| ko05416 | Viral myocarditis | 0.831664 | 0.995348 |
| ko00650 | Butanoate metabolism | 0.83395 | 0.995348 |
| ko05221 | Acute myeloid leukemia | 0.842649 | 0.995348 |
| ko05414 | Dilated cardiomyopathy | 0.846434 | 0.995348 |
| ko04341 | Hedgehog signaling pathway - fly | 0.850632 | 0.995348 |
| ko05152 | Tuberculosis | 0.852293 | 0.995348 |
| ko05412 | Arrhythmogenic right ventricular cardiomyopathy | 0.853316 | 0.995348 |
| ko04330 | Notch signaling pathway | 0.857018 | 0.995348 |
| ko04623 | Cytosolic DNA-sensing pathway | 0.857018 | 0.995348 |
| ko01230 | Biosynthesis of amino acids | 0.863348 | 0.995348 |
| ko00680 | Methane metabolism | 0.865641 | 0.995348 |
| ko00982 | Drug metabolism - cytochrome P450 | 0.865641 | 0.995348 |
| ko04975 | Fat digestion and absorption | 0.865641 | 0.995348 |
| ko05340 | Primary immunodeficiency | 0.865641 | 0.995348 |
| ko00970 | Aminoacyl-tRNA biosynthesis | 0.868344 | 0.995348 |
| ko00260 | Glycine, serine and threonine metabolism | 0.879146 | 0.995348 |
| ko00640 | Propanoate metabolism | 0.879146 | 0.995348 |
| ko00983 | Drug metabolism - other enzymes | 0.879146 | 0.995348 |
| ko05224 | Breast cancer | 0.887436 | 0.995348 |
| ko00280 | Valine, leucine and isoleucine degradation | 0.888564 | 0.995348 |
| ko00500 | Starch and sucrose metabolism | 0.891296 | 0.995348 |
| ko04922 | Glucagon signaling pathway | 0.895749 | 0.995348 |
| ko00410 | beta-Alanine metabolism | 0.902228 | 0.995348 |
| ko04610 | Complement and coagulation cascades | 0.905875 | 0.995348 |
| ko04136 | Autophagy - other | 0.912062 | 0.995348 |
| ko05150 | Staphylococcus aureus infection | 0.913558 | 0.995348 |
| ko05020 | Prion disease | 0.91959 | 0.995348 |
| ko00830 | Retinol metabolism | 0.92091 | 0.995348 |
| ko04658 | Th1 and Th2 cell differentiation | 0.924073 | 0.995348 |
| ko04142 | Lysosome | 0.924523 | 0.995348 |
| ko04020 | Calcium signaling pathway | 0.924885 | 0.995348 |
| ko05217 | Basal cell carcinoma | 0.927193 | 0.995348 |
| ko00051 | Fructose and mannose metabolism | 0.92887 | 0.995348 |
| ko03022 | Basal transcription factors | 0.92887 | 0.995348 |
| ko05410 | Hypertrophic cardiomyopathy | 0.929617 | 0.995348 |
| ko04613 | Neutrophil extracellular trap formation | 0.943744 | 0.99962 |
| ko05034 | Alcoholism | 0.944096 | 0.99962 |
| ko05030 | Cocaine addiction | 0.948266 | 0.99962 |
| ko00600 | Sphingolipid metabolism | 0.953478 | 0.99962 |
| ko00620 | Pyruvate metabolism | 0.953478 | 0.99962 |
| ko00071 | Fatty acid degradation | 0.962382 | 0.99962 |
| ko00513 | Various types of N-glycan biosynthesis | 0.962382 | 0.99962 |
| ko04014 | Ras signaling pathway | 0.968129 | 0.99962 |
| ko05031 | Amphetamine addiction | 0.975413 | 0.99962 |
| ko05016 | Huntington disease | 0.977647 | 0.99962 |
| ko00510 | N-Glycan biosynthesis | 0.980126 | 0.99962 |
| ko01212 | Fatty acid metabolism | 0.980126 | 0.99962 |
| ko04146 | Peroxisome | 0.984045 | 0.99962 |
| ko04080 | Neuroactive ligand-receptor interaction | 0.985243 | 0.99962 |
| ko01100 | Metabolic pathways | 0.991119 | 0.99962 |
| ko03010 | Ribosome | 0.99166 | 0.99962 |
| ko04714 | Thermogenesis | 0.998558 | 0.99962 |
| ko01110 | Biosynthesis of secondary metabolites | 0.999128 | 0.99962 |
| ko00190 | Oxidative phosphorylation | 0.99935 | 0.99962 |
| ko01120 | Microbial metabolism in diverse environments | 0.999533 | 0.99962 |
| ko01200 | Carbon metabolism | 0.99962 | 0.99962 |

**S Table 7**

| ID | Descrption | Pvalue | Qvalue |
| --- | --- | --- | --- |
| ko04714 | Thermogenesis | 2.54E-07 | 8.65E-05 |
| ko01100 | Metabolic pathways | 8.35E-07 | 1.42E-04 |
| ko05415 | Diabetic cardiomyopathy | 1.54E-06 | 1.76E-04 |
| ko05208 | Chemical carcinogenesis - reactive oxygen species | 6.11E-06 | 5.21E-04 |
| ko05012 | Parkinson disease | 9.22E-06 | 5.92E-04 |
| ko04932 | Non-alcoholic fatty liver disease | 1.04E-05 | 5.92E-04 |
| ko05020 | Prion disease | 2.41E-05 | 1.17E-03 |
| ko00190 | Oxidative phosphorylation | 4.69E-05 | 2.00E-03 |
| ko04260 | Cardiac muscle contraction | 5.46E-05 | 2.07E-03 |
| ko00071 | Fatty acid degradation | 6.59E-05 | 2.25E-03 |
| ko05014 | Amyotrophic lateral sclerosis | 0.000289989 | 8.56E-03 |
| ko00980 | Metabolism of xenobiotics by cytochrome P450 | 0.000339102 | 8.56E-03 |
| ko01212 | Fatty acid metabolism | 0.000341104 | 8.56E-03 |
| ko05016 | Huntington disease | 0.000351576 | 8.56E-03 |
| ko00062 | Fatty acid elongation | 0.00048134 | 1.09E-02 |
| ko05010 | Alzheimer disease | 0.001333774 | 2.84E-02 |
| ko01110 | Biosynthesis of secondary metabolites | 0.00192378 | 3.86E-02 |
| ko05022 | Pathways of neurodegeneration - multiple diseases | 0.003660763 | 6.94E-02 |
| ko01120 | Microbial metabolism in diverse environments | 0.005484971 | 9.84E-02 |
| ko04152 | AMPK signaling pathway | 0.009141602 | 1.53E-01 |
| ko05410 | Hypertrophic cardiomyopathy | 0.009393782 | 1.53E-01 |
| ko04146 | Peroxisome | 0.01200401 | 1.77E-01 |
| ko05414 | Dilated cardiomyopathy | 0.01200401 | 1.77E-01 |
| ko00982 | Drug metabolism - cytochrome P450 | 0.01245635 | 1.77E-01 |
| ko04913 | Ovarian steroidogenesis | 0.0155854 | 2.13E-01 |
| ko00590 | Arachidonic acid metabolism | 0.01768072 | 2.28E-01 |
| ko00280 | Valine, leucine and isoleucine degradation | 0.01804 | 2.28E-01 |
| ko04919 | Thyroid hormone signaling pathway | 0.02393877 | 2.92E-01 |
| ko04261 | Adrenergic signaling in cardiomyocytes | 0.02681958 | 2.96E-01 |
| ko00592 | alpha-Linolenic acid metabolism | 0.02688742 | 2.96E-01 |
| ko00910 | Nitrogen metabolism | 0.02688742 | 2.96E-01 |
| ko00270 | Cysteine and methionine metabolism | 0.02845319 | 3.03E-01 |
| ko04964 | Proximal tubule bicarbonate reclamation | 0.03005644 | 3.06E-01 |
| ko00020 | Citrate cycle (TCA cycle) | 0.03318114 | 3.06E-01 |
| ko00830 | Retinol metabolism | 0.03318114 | 3.06E-01 |
| ko04210 | Apoptosis | 0.03329062 | 3.06E-01 |
| ko05418 | Fluid shear stress and atherosclerosis | 0.03329062 | 3.06E-01 |
| ko04211 | Longevity regulating pathway | 0.03495244 | 3.06E-01 |
| ko04971 | Gastric acid secretion | 0.03496374 | 3.06E-01 |
| ko00860 | Porphyrin metabolism | 0.0447603 | 3.82E-01 |
| ko04723 | Retrograde endocannabinoid signaling | 0.04762728 | 3.89E-01 |
| ko04022 | cGMP-PKG signaling pathway | 0.0479446 | 3.89E-01 |
| ko00350 | Tyrosine metabolism | 0.05337469 | 4.23E-01 |
| ko01040 | Biosynthesis of unsaturated fatty acids | 0.05929657 | 4.39E-01 |
| ko04213 | Longevity regulating pathway - multiple species | 0.06112115 | 4.39E-01 |
| ko04923 | Regulation of lipolysis in adipocytes | 0.06112115 | 4.39E-01 |
| ko00480 | Glutathione metabolism | 0.06282201 | 4.39E-01 |
| ko00983 | Drug metabolism - other enzymes | 0.06282201 | 4.39E-01 |
| ko04750 | Inflammatory mediator regulation of TRP channels | 0.063076 | 4.39E-01 |
| ko01230 | Biosynthesis of amino acids | 0.06613493 | 4.51E-01 |
| ko00360 | Phenylalanine metabolism | 0.07283001 | 4.60E-01 |
| ko00720 | Carbon fixation pathways in prokaryotes | 0.07283001 | 4.60E-01 |
| ko01523 | Antifolate resistance | 0.07283001 | 4.60E-01 |
| ko05204 | Chemical carcinogenesis - DNA adducts | 0.07283001 | 4.60E-01 |
| ko04270 | Vascular smooth muscle contraction | 0.07513944 | 4.66E-01 |
| ko00785 | Lipoic acid metabolism | 0.07711886 | 4.70E-01 |
| ko00410 | beta-Alanine metabolism | 0.08414522 | 5.02E-01 |
| ko04371 | Apelin signaling pathway | 0.0854247 | 5.02E-01 |
| ko01522 | Endocrine resistance | 0.09418993 | 5.44E-01 |
| ko03050 | Proteasome | 0.09597026 | 5.45E-01 |
| ko04910 | Insulin signaling pathway | 0.09989383 | 5.58E-01 |
| ko00511 | Other glycan degradation | 0.1035087 | 5.69E-01 |
| ko05231 | Choline metabolism in cancer | 0.1087186 | 5.88E-01 |
| ko01200 | Carbon metabolism | 0.1133179 | 5.94E-01 |
| ko05207 | Chemical carcinogenesis - receptor activation | 0.1191124 | 5.94E-01 |
| ko04970 | Salivary secretion | 0.1191398 | 5.94E-01 |
| ko00340 | Histidine metabolism | 0.1204592 | 5.94E-01 |
| ko04979 | Cholesterol metabolism | 0.121781 | 5.94E-01 |
| ko00040 | Pentose and glucuronate interconversions | 0.1218449 | 5.94E-01 |
| ko00604 | Glycosphingolipid biosynthesis - ganglio series | 0.1218449 | 5.94E-01 |
| ko05221 | Acute myeloid leukemia | 0.1291082 | 6.13E-01 |
| ko04020 | Calcium signaling pathway | 0.1312803 | 6.13E-01 |
| ko04024 | cAMP signaling pathway | 0.1312803 | 6.13E-01 |
| ko04915 | Estrogen signaling pathway | 0.1358045 | 6.13E-01 |
| ko04724 | Glutamatergic synapse | 0.136668 | 6.13E-01 |
| ko00630 | Glyoxylate and dicarboxylate metabolism | 0.138346 | 6.13E-01 |
| ko00650 | Butanoate metabolism | 0.138346 | 6.13E-01 |
| ko00930 | Caprolactam degradation | 0.1483085 | 6.25E-01 |
| ko01051 | Biosynthesis of ansamycins | 0.1483085 | 6.25E-01 |
| ko03070 | Bacterial secretion system | 0.1483085 | 6.25E-01 |
| ko00591 | Linoleic acid metabolism | 0.1489757 | 6.25E-01 |
| ko00380 | Tryptophan metabolism | 0.150204 | 6.25E-01 |
| ko04976 | Bile secretion | 0.1522619 | 6.26E-01 |
| ko04341 | Hedgehog signaling pathway - fly | 0.1570632 | 6.38E-01 |
| ko04550 | Signaling pathways regulating pluripotency of stem cells | 0.1604311 | 6.40E-01 |
| ko03320 | PPAR signaling pathway | 0.1612865 | 6.40E-01 |
| ko04740 | Olfactory transduction | 0.1652834 | 6.48E-01 |
| ko04920 | Adipocytokine signaling pathway | 0.1727188 | 6.62E-01 |
| ko04972 | Pancreatic secretion | 0.1727188 | 6.62E-01 |
| ko04725 | Cholinergic synapse | 0.1765244 | 6.69E-01 |
| ko00620 | Pyruvate metabolism | 0.1808779 | 6.78E-01 |
| ko05218 | Melanoma | 0.1917156 | 7.05E-01 |
| ko04931 | Insulin resistance | 0.1963304 | 7.05E-01 |
| ko00260 | Glycine, serine and threonine metabolism | 0.1965664 | 7.05E-01 |
| ko00640 | Propanoate metabolism | 0.1965664 | 7.05E-01 |
| ko00534 | Glycosaminoglycan biosynthesis - heparan sulfate / heparin | 0.2060587 | 7.05E-01 |
| ko00670 | One carbon pool by folate | 0.2060587 | 7.05E-01 |
| ko00710 | Carbon fixation in photosynthetic organisms | 0.2060587 | 7.05E-01 |
| ko01210 | 2-Oxocarboxylic acid metabolism | 0.2060587 | 7.05E-01 |
| ko04370 | VEGF signaling pathway | 0.2134145 | 7.05E-01 |
| ko05416 | Viral myocarditis | 0.2134145 | 7.05E-01 |
| ko00281 | Geraniol degradation | 0.2140234 | 7.05E-01 |
| ko00920 | Sulfur metabolism | 0.2140234 | 7.05E-01 |
| ko00140 | Steroid hormone biosynthesis | 0.2171465 | 7.05E-01 |
| ko00512 | Mucin type O-glycan biosynthesis | 0.2171465 | 7.05E-01 |
| ko04925 | Aldosterone synthesis and secretion | 0.2215052 | 7.13E-01 |
| ko05145 | Toxoplasmosis | 0.2323351 | 7.23E-01 |
| ko04061 | Viral protein interaction with cytokine and cytokine receptor | 0.2343301 | 7.23E-01 |
| ko04662 | B cell receptor signaling pathway | 0.2343301 | 7.23E-01 |
| ko04727 | GABAergic synapse | 0.2343301 | 7.23E-01 |
| ko04392 | Hippo signaling pathway - multiple species | 0.2354111 | 7.23E-01 |
| ko04960 | Aldosterone-regulated sodium reabsorption | 0.2381467 | 7.25E-01 |
| ko04330 | Notch signaling pathway | 0.2474158 | 7.27E-01 |
| ko04961 | Endocrine and other factor-regulated calcium reabsorption | 0.2474158 | 7.27E-01 |
| ko04350 | TGF-beta signaling pathway | 0.2474587 | 7.27E-01 |
| ko05212 | Pancreatic cancer | 0.2474587 | 7.27E-01 |
| ko00970 | Aminoacyl-tRNA biosynthesis | 0.2648419 | 7.71E-01 |
| ko00460 | Cyanoamino acid metabolism | 0.2746834 | 7.71E-01 |
| ko04122 | Sulfur relay system | 0.2746834 | 7.71E-01 |
| ko04062 | Chemokine signaling pathway | 0.2790146 | 7.71E-01 |
| ko04911 | Insulin secretion | 0.2792958 | 7.71E-01 |
| ko05220 | Chronic myeloid leukemia | 0.2792958 | 7.71E-01 |
| ko03410 | Base excision repair | 0.2810367 | 7.71E-01 |
| ko04742 | Taste transduction | 0.2810367 | 7.71E-01 |
| ko05031 | Amphetamine addiction | 0.2824873 | 7.71E-01 |
| ko04914 | Progesterone-mediated oocyte maturation | 0.287874 | 7.79E-01 |
| ko00010 | Glycolysis / Gluconeogenesis | 0.2946647 | 7.90E-01 |
| ko04072 | Phospholipase D signaling pathway | 0.2964056 | 7.90E-01 |
| ko04929 | GnRH secretion | 0.300305 | 7.94E-01 |
| ko01521 | EGFR tyrosine kinase inhibitor resistance | 0.3101738 | 7.99E-01 |
| ko05230 | Central carbon metabolism in cancer | 0.3101738 | 7.99E-01 |
| ko04151 | PI3K-Akt signaling pathway | 0.31153 | 7.99E-01 |
| ko05200 | Pathways in cancer | 0.3116292 | 7.99E-01 |
| ko04924 | Renin secretion | 0.3182496 | 8.08E-01 |
| ko05206 | MicroRNAs in cancer | 0.3202157 | 8.08E-01 |
| ko04012 | ErbB signaling pathway | 0.3257937 | 8.08E-01 |
| ko04015 | Rap1 signaling pathway | 0.3290388 | 8.08E-01 |
| ko00740 | Riboflavin metabolism | 0.330676 | 8.08E-01 |
| ko00950 | Isoquinoline alkaloid biosynthesis | 0.330676 | 8.08E-01 |
| ko05017 | Spinocerebellar ataxia | 0.3316795 | 8.08E-01 |
| ko01524 | Platinum drug resistance | 0.3362773 | 8.08E-01 |
| ko05211 | Renal cell carcinoma | 0.3362773 | 8.08E-01 |
| ko04014 | Ras signaling pathway | 0.3389932 | 8.08E-01 |
| ko00030 | Pentose phosphate pathway | 0.3529879 | 8.26E-01 |
| ko00220 | Arginine biosynthesis | 0.3529879 | 8.26E-01 |
| ko04150 | mTOR signaling pathway | 0.3536455 | 8.26E-01 |
| ko04070 | Phosphatidylinositol signaling system | 0.3577876 | 8.30E-01 |
| ko05030 | Cocaine addiction | 0.3680636 | 8.42E-01 |
| ko05205 | Proteoglycans in cancer | 0.3691703 | 8.42E-01 |
| ko04922 | Glucagon signaling pathway | 0.3719678 | 8.42E-01 |
| ko05222 | Small cell lung cancer | 0.3730354 | 8.42E-01 |
| ko04710 | Circadian rhythm | 0.3816068 | 8.43E-01 |
| ko04745 | Phototransduction - fly | 0.3816068 | 8.43E-01 |
| ko00130 | Ubiquinone and other terpenoid-quinone biosynthesis | 0.3823593 | 8.43E-01 |
| ko04340 | Hedgehog signaling pathway | 0.3896619 | 8.43E-01 |
| ko04973 | Carbohydrate digestion and absorption | 0.3896619 | 8.43E-01 |
| ko04918 | Thyroid hormone synthesis | 0.3904496 | 8.43E-01 |
| ko05217 | Basal cell carcinoma | 0.3904496 | 8.43E-01 |
| ko04611 | Platelet activation | 0.3960556 | 8.49E-01 |
| ko05146 | Amoebiasis | 0.40458 | 8.55E-01 |
| ko05032 | Morphine addiction | 0.4084102 | 8.55E-01 |
| ko04068 | FoxO signaling pathway | 0.4090772 | 8.55E-01 |
| ko04215 | Apoptosis - multiple species | 0.4096747 | 8.55E-01 |
| ko00250 | Alanine, aspartate and glutamate metabolism | 0.4110757 | 8.55E-01 |
| ko04060 | Cytokine-cytokine receptor interaction | 0.4155408 | 8.57E-01 |
| ko05210 | Colorectal cancer | 0.4202922 | 8.57E-01 |
| ko05214 | Glioma | 0.4262646 | 8.57E-01 |
| ko05202 | Transcriptional misregulation in cancer | 0.4280453 | 8.57E-01 |
| ko00120 | Primary bile acid biosynthesis | 0.4300639 | 8.57E-01 |
| ko00603 | Glycosphingolipid biosynthesis - globo and isoglobo series | 0.4300639 | 8.57E-01 |
| ko04626 | Plant-pathogen interaction | 0.4300639 | 8.57E-01 |
| ko04978 | Mineral absorption | 0.4322537 | 8.57E-01 |
| ko00680 | Methane metabolism | 0.4371065 | 8.57E-01 |
| ko05340 | Primary immunodeficiency | 0.4371065 | 8.57E-01 |
| ko04066 | HIF-1 signaling pathway | 0.4427976 | 8.58E-01 |
| ko04114 | Oocyte meiosis | 0.4427976 | 8.58E-01 |
| ko04142 | Lysosome | 0.4480092 | 8.63E-01 |
| ko05166 | Human T-cell leukemia virus 1 infection | 0.4608694 | 8.74E-01 |
| ko00052 | Galactose metabolism | 0.4638332 | 8.74E-01 |
| ko00564 | Glycerophospholipid metabolism | 0.466916 | 8.74E-01 |
| ko04921 | Oxytocin signaling pathway | 0.4737225 | 8.74E-01 |
| ko04391 | Hippo signaling pathway - fly | 0.4737233 | 8.74E-01 |
| ko04623 | Cytosolic DNA-sensing pathway | 0.4737233 | 8.74E-01 |
| ko04927 | Cortisol synthesis and secretion | 0.4737233 | 8.74E-01 |
| ko02024 | Quorum sensing | 0.4740951 | 8.74E-01 |
| ko05412 | Arrhythmogenic right ventricular cardiomyopathy | 0.4788867 | 8.78E-01 |
| ko04916 | Melanogenesis | 0.4822178 | 8.79E-01 |
| ko03020 | RNA polymerase | 0.4898002 | 8.86E-01 |
| ko04613 | Neutrophil extracellular trap formation | 0.4983525 | 8.86E-01 |
| ko04390 | Hippo signaling pathway | 0.5116901 | 8.86E-01 |
| ko05215 | Prostate cancer | 0.5123509 | 8.86E-01 |
| ko04540 | Gap junction | 0.512919 | 8.86E-01 |
| ko04713 | Circadian entrainment | 0.512919 | 8.86E-01 |
| ko00561 | Glycerolipid metabolism | 0.5137611 | 8.86E-01 |
| ko00053 | Ascorbate and aldarate metabolism | 0.5147351 | 8.86E-01 |
| ko00533 | Glycosaminoglycan biosynthesis - keratan sulfate | 0.5147351 | 8.86E-01 |
| ko02020 | Two-component system | 0.5147351 | 8.86E-01 |
| ko04016 | MAPK signaling pathway - plant | 0.5147351 | 8.86E-01 |
| ko04666 | Fc gamma R-mediated phagocytosis | 0.5271496 | 9.03E-01 |
| ko04912 | GnRH signaling pathway | 0.5295524 | 9.03E-01 |
| ko00562 | Inositol phosphate metabolism | 0.5459051 | 9.19E-01 |
| ko00330 | Arginine and proline metabolism | 0.5521294 | 9.19E-01 |
| ko04115 | p53 signaling pathway | 0.5521294 | 9.19E-01 |
| ko00450 | Selenocompound metabolism | 0.5522441 | 9.19E-01 |
| ko00531 | Glycosaminoglycan degradation | 0.5522441 | 9.19E-01 |
| ko04670 | Leukocyte transendothelial migration | 0.556138 | 9.21E-01 |
| ko04620 | Toll-like receptor signaling pathway | 0.5619607 | 9.23E-01 |
| ko05216 | Thyroid cancer | 0.5627765 | 9.23E-01 |
| ko04933 | AGE-RAGE signaling pathway in diabetic complications | 0.5703022 | 9.27E-01 |
| ko04610 | Complement and coagulation cascades | 0.570631 | 9.27E-01 |
| ko00051 | Fructose and mannose metabolism | 0.5853872 | 9.34E-01 |
| ko00790 | Folate biosynthesis | 0.5868626 | 9.34E-01 |
| ko03450 | Non-homologous end-joining | 0.5868626 | 9.34E-01 |
| ko00310 | Lysine degradation | 0.5886548 | 9.34E-01 |
| ko04917 | Prolactin signaling pathway | 0.5886548 | 9.34E-01 |
| ko05142 | Chagas disease | 0.597915 | 9.35E-01 |
| ko00520 | Amino sugar and nucleotide sugar metabolism | 0.6061876 | 9.35E-01 |
| ko04664 | Fc epsilon RI signaling pathway | 0.6061876 | 9.35E-01 |
| ko05225 | Hepatocellular carcinoma | 0.6075052 | 9.35E-01 |
| ko04974 | Protein digestion and absorption | 0.6082072 | 9.35E-01 |
| ko05100 | Bacterial invasion of epithelial cells | 0.6082072 | 9.35E-01 |
| ko04360 | Axon guidance | 0.6121583 | 9.35E-01 |
| ko00061 | Fatty acid biosynthesis | 0.6188127 | 9.35E-01 |
| ko04658 | Th1 and Th2 cell differentiation | 0.6229456 | 9.35E-01 |
| ko05213 | Endometrial cancer | 0.6232196 | 9.35E-01 |
| ko04668 | TNF signaling pathway | 0.6245125 | 9.35E-01 |
| ko00240 | Pyrimidine metabolism | 0.627987 | 9.35E-01 |
| ko00565 | Ether lipid metabolism | 0.627987 | 9.35E-01 |
| ko04216 | Ferroptosis | 0.627987 | 9.35E-01 |
| ko04010 | MAPK signaling pathway | 0.6342957 | 9.40E-01 |
| ko04011 | MAPK signaling pathway - yeast | 0.6482995 | 9.51E-01 |
| ko00230 | Purine metabolism | 0.6500356 | 9.51E-01 |
| ko04510 | Focal adhesion | 0.6533002 | 9.51E-01 |
| ko00514 | Other types of O-glycan biosynthesis | 0.6671159 | 9.51E-01 |
| ko00600 | Sphingolipid metabolism | 0.6671159 | 9.51E-01 |
| ko04217 | Necroptosis | 0.6744411 | 9.51E-01 |
| ko00770 | Pantothenate and CoA biosynthesis | 0.6755123 | 9.51E-01 |
| ko03060 | Protein export | 0.6755123 | 9.51E-01 |
| ko04977 | Vitamin digestion and absorption | 0.6755123 | 9.51E-01 |
| ko04625 | C-type lectin receptor signaling pathway | 0.6783146 | 9.51E-01 |
| ko05034 | Alcoholism | 0.6783146 | 9.51E-01 |
| ko05235 | PD-L1 expression and PD-1 checkpoint pathway in cancer | 0.6783146 | 9.51E-01 |
| ko05224 | Breast cancer | 0.6836412 | 9.51E-01 |
| ko04930 | Type II diabetes mellitus | 0.6854044 | 9.51E-01 |
| ko05162 | Measles | 0.686215 | 9.51E-01 |
| ko04726 | Serotonergic synapse | 0.6862298 | 9.51E-01 |
| ko00100 | Steroid biosynthesis | 0.7006259 | 9.63E-01 |
| ko05223 | Non-small cell lung cancer | 0.7006956 | 9.63E-01 |
| ko05144 | Malaria | 0.7028631 | 9.63E-01 |
| ko04630 | JAK-STAT signaling pathway | 0.7197946 | 9.68E-01 |
| ko04926 | Relaxin signaling pathway | 0.7197946 | 9.68E-01 |
| ko05160 | Hepatitis C | 0.7197946 | 9.68E-01 |
| ko00515 | Mannose type O-glycan biosynthesis | 0.7238018 | 9.68E-01 |
| ko04614 | Renin-angiotensin system | 0.7238018 | 9.68E-01 |
| ko04966 | Collecting duct acid secretion | 0.7238018 | 9.68E-01 |
| ko05163 | Human cytomegalovirus infection | 0.7275399 | 9.69E-01 |
| ko04722 | Neurotrophin signaling pathway | 0.730404 | 9.69E-01 |
| ko05322 | Systemic lupus erythematosus | 0.7353679 | 9.72E-01 |
| ko04659 | Th17 cell differentiation | 0.7392304 | 9.72E-01 |
| ko03008 | Ribosome biogenesis in eukaryotes | 0.741048 | 9.72E-01 |
| ko05033 | Nicotine addiction | 0.745189 | 9.73E-01 |
| ko04810 | Regulation of actin cytoskeleton | 0.7524436 | 9.73E-01 |
| ko05152 | Tuberculosis | 0.7530628 | 9.73E-01 |
| ko04512 | ECM-receptor interaction | 0.7535039 | 9.73E-01 |
| ko04380 | Osteoclast differentiation | 0.7610223 | 9.77E-01 |
| ko03430 | Mismatch repair | 0.7649251 | 9.77E-01 |
| ko05332 | Graft-versus-host disease | 0.7649251 | 9.77E-01 |
| ko04660 | T cell receptor signaling pathway | 0.7713783 | 9.81E-01 |
| ko04975 | Fat digestion and absorption | 0.7831372 | 9.88E-01 |
| ko05330 | Allograft rejection | 0.7831372 | 9.88E-01 |
| ko04530 | Tight junction | 0.7874381 | 9.88E-01 |
| ko04650 | Natural killer cell mediated cytotoxicity | 0.7880024 | 9.88E-01 |
| ko04934 | Cushing syndrome | 0.7965861 | 9.92E-01 |
| ko04962 | Vasopressin-regulated water reabsorption | 0.7999427 | 9.92E-01 |
| ko05320 | Autoimmune thyroid disease | 0.7999427 | 9.92E-01 |
| ko05226 | Gastric cancer | 0.8129729 | 9.94E-01 |
| ko00500 | Starch and sucrose metabolism | 0.8154498 | 9.94E-01 |
| ko04218 | Cellular senescence | 0.820764 | 9.94E-01 |
| ko05164 | Influenza A | 0.820764 | 9.94E-01 |
| ko04111 | Cell cycle - yeast | 0.826245 | 9.94E-01 |
| ko04728 | Dopaminergic synapse | 0.8262813 | 9.94E-01 |
| ko04935 | Growth hormone synthesis, secretion and action | 0.8262813 | 9.94E-01 |
| ko04071 | Sphingolipid signaling pathway | 0.84198 | 9.94E-01 |
| ko04514 | Cell adhesion molecules | 0.84198 | 9.94E-01 |
| ko04140 | Autophagy - animal | 0.842583 | 9.94E-01 |
| ko04136 | Autophagy - other | 0.8429614 | 9.94E-01 |
| ko04940 | Type I diabetes mellitus | 0.8429614 | 9.94E-01 |
| ko04113 | Meiosis - yeast | 0.8465022 | 9.94E-01 |
| ko04520 | Adherens junction | 0.8465022 | 9.94E-01 |
| ko03030 | DNA replication | 0.8551433 | 9.94E-01 |
| ko05135 | Yersinia infection | 0.8558841 | 9.94E-01 |
| ko04936 | Alcoholic liver disease | 0.856474 | 9.94E-01 |
| ko05168 | Herpes simplex virus 1 infection | 0.8634885 | 9.94E-01 |
| ko04657 | IL-17 signaling pathway | 0.8645954 | 9.94E-01 |
| ko05167 | Kaposi sarcoma-associated herpesvirus infection | 0.868239 | 9.94E-01 |
| ko05132 | Salmonella infection | 0.8685261 | 9.94E-01 |
| ko05169 | Epstein-Barr virus infection | 0.8688289 | 9.94E-01 |
| ko05131 | Shigellosis | 0.8766004 | 9.94E-01 |
| ko02010 | ABC transporters | 0.8767535 | 9.94E-01 |
| ko03440 | Homologous recombination | 0.8767535 | 9.94E-01 |
| ko04928 | Parathyroid hormone synthesis, secretion and action | 0.8819424 | 9.94E-01 |
| ko04621 | NOD-like receptor signaling pathway | 0.8820983 | 9.94E-01 |
| ko05161 | Hepatitis B | 0.8850949 | 9.94E-01 |
| ko04672 | Intestinal immune network for IgA production | 0.8863215 | 9.94E-01 |
| ko03420 | Nucleotide excision repair | 0.8951489 | 9.95E-01 |
| ko04120 | Ubiquitin mediated proteolysis | 0.8986254 | 9.95E-01 |
| ko05417 | Lipid and atherosclerosis | 0.8986922 | 9.95E-01 |
| ko05203 | Viral carcinogenesis | 0.9000768 | 9.95E-01 |
| ko05130 | Pathogenic Escherichia coli infection | 0.9030603 | 9.95E-01 |
| ko05323 | Rheumatoid arthritis | 0.9077805 | 9.95E-01 |
| ko03460 | Fanconi anemia pathway | 0.9108063 | 9.95E-01 |
| ko00513 | Various types of N-glycan biosynthesis | 0.9177378 | 9.95E-01 |
| ko04622 | RIG-I-like receptor signaling pathway | 0.9177378 | 9.95E-01 |
| ko05110 | Vibrio cholerae infection | 0.9177378 | 9.95E-01 |
| ko04730 | Long-term depression | 0.9241322 | 9.95E-01 |
| ko04110 | Cell cycle | 0.9249289 | 9.95E-01 |
| ko04720 | Long-term potentiation | 0.9300311 | 9.95E-01 |
| ko05321 | Inflammatory bowel disease | 0.9300311 | 9.95E-01 |
| ko04138 | Autophagy - yeast | 0.9335642 | 9.95E-01 |
| ko04640 | Hematopoietic cell lineage | 0.9335642 | 9.95E-01 |
| ko05165 | Human papillomavirus infection | 0.9433204 | 9.99E-01 |
| ko04612 | Antigen processing and presentation | 0.9451228 | 9.99E-01 |
| ko00510 | N-Glycan biosynthesis | 0.949394 | 9.99E-01 |
| ko05133 | Pertussis | 0.9533338 | 9.99E-01 |
| ko04080 | Neuroactive ligand-receptor interaction | 0.9538146 | 9.99E-01 |
| ko05171 | Coronavirus disease - COVID-19 | 0.959023 | 9.99E-01 |
| ko05140 | Leishmaniasis | 0.9603196 | 9.99E-01 |
| ko04145 | Phagosome | 0.9632082 | 9.99E-01 |
| ko05120 | Epithelial cell signaling in Helicobacter pylori infection | 0.9662627 | 9.99E-01 |
| ko05170 | Human immunodeficiency virus 1 infection | 0.9723816 | 9.99E-01 |
| ko04310 | Wnt signaling pathway | 0.9745747 | 9.99E-01 |
| ko04361 | Axon regeneration | 0.9792752 | 9.99E-01 |
| ko03018 | RNA degradation | 0.9808933 | 9.99E-01 |
| ko04137 | Mitophagy - animal | 0.9808933 | 9.99E-01 |
| ko03015 | mRNA surveillance pathway | 0.9872788 | 9.99E-01 |
| ko04212 | Longevity regulating pathway - worm | 0.9882735 | 9.99E-01 |
| ko04144 | Endocytosis | 0.990647 | 9.99E-01 |
| ko04064 | NF-kappa B signaling pathway | 0.9933721 | 9.99E-01 |
| ko03010 | Ribosome | 0.9948115 | 9.99E-01 |
| ko03013 | Nucleocytoplasmic transport | 0.9962578 | 9.99E-01 |
| ko04141 | Protein processing in endoplasmic reticulum | 0.9998713 | 1.00E+00 |

**S Table 8**

| Class | Num-QS | Num-YN |
| --- | --- | --- |
| TG | 501 | 501 |
| PC | 378 | 378 |
| PE | 212 | 212 |
| DG | 116 | 117 |
| CL | 100 | 100 |
| Cer | 93 | 93 |
| SM | 90 | 90 |
| MePC | 90 | 88 |
| Hex1Cer | 85 | 85 |
| dMePE | 73 | 73 |
| PS | 56 | 57 |
| MGDG | 48 | 48 |
| LPC | 44 | 44 |
| PI | 39 | 39 |
| BisMePA | 39 | 39 |
| PG | 29 | 29 |
| Hex2Cer | 27 | 27 |
| AcCa | 27 | 27 |
| LPE | 21 | 21 |
| SPH | 17 | 17 |
| phSM | 11 | 11 |
| PEt | 9 | 9 |
| DGDG | 9 | 8 |
| LdMePE | 8 | 8 |
| Hex3Cer | 8 | 8 |
| ZyE | 7 | 7 |
| WE | 7 | 7 |
| GM3 | 7 | 7 |
| SQDG | 6 | 6 |
| LBPA | 6 | 6 |
| CerG3GNAc1 | 6 | 6 |
| CarE | 6 | 6 |
| Co | 5 | 5 |
| PA | 4 | 4 |
| OAHFA | 3 | 3 |
| StE | 2 | 2 |
| SPHP | 2 | 2 |
| LSM | 2 | 2 |
| LPI | 2 | 2 |
| LPG | 2 | 2 |
| CerG2GNAc1 | 2 | 2 |
| BiotinylPE | 2 | 2 |
| ST | 1 | 1 |
| PIP | 1 | 1 |
| MGMG | 1 | 1 |
| MG | 1 | 1 |
| FA | 1 | 1 |
| CerPE | 1 | 1 |
| CerP | 1 | 1 |
| CerG3GNAc2 | 1 | 1 |
| AEA | 1 | 1 |

**S Table 9**

| name | Count | proportion |
| --- | --- | --- |
| PC | 90 | 19.57 |
| TG | 84 | 18.26 |
| PE | 61 | 13.26 |
| DG | 31 | 6.74 |
| CL | 28 | 6.09 |
| SM | 21 | 4.57 |
| MePC | 20 | 4.35 |
| dMePE | 17 | 3.70 |
| Hex1Cer | 16 | 3.48 |
| PI | 13 | 2.83 |
| PS | 12 | 2.61 |
| BisMePA | 11 | 2.39 |
| Cer | 9 | 1.96 |
| PG | 9 | 1.96 |
| MGDG | 7 | 1.52 |
| LPC | 6 | 1.30 |
| ZyE | 5 | 1.09 |
| phSM | 3 | 0.65 |
| SPH | 2 | 0.43 |
| StE | 2 | 0.43 |
| AcCa | 1 | 0.22 |
| CerG3GNAc2 | 1 | 0.22 |
| CerPE | 1 | 0.22 |
| DGDG | 1 | 0.22 |
| Hex2Cer | 1 | 0.22 |
| LBPA | 1 | 0.22 |
| LdMePE | 1 | 0.22 |
| LPE | 1 | 0.22 |
| OAHFA | 1 | 0.22 |
| PEt | 1 | 0.22 |
| PIP | 1 | 0.22 |
| SQDG | 1 | 0.22 |
| WE | 1 | 0.22 |

**S** **Table 10**

| metabolites1 | metabolites2 | correlation | pvalue |
| --- | --- | --- | --- |
| AcCa | AcCa | 1 | 0 |
| OAHFA | AcCa | 0.89711877 | 0.002516639 |
| dMePE | AcCa | 0.884649417 | 0.003512769 |
| LdMePE | AcCa | 0.725960694 | 0.041454425 |
| LPC | AcCa | 0.896266261 | 0.00257801 |
| CL | AcCa | 0.827557138 | 0.011218826 |
| PC | AcCa | 0.562712075 | 0.146482324 |
| Pet | AcCa | 0.791651698 | 0.019224569 |
| Hex1Cer | AcCa | 0.834581865 | 0.009958461 |
| Hex2Cer | AcCa | 0.851262033 | 0.007335943 |
| SM | AcCa | 0.882640851 | 0.003693679 |
| SPH | AcCa | 0.868777513 | 0.005107554 |
| MGDG | AcCa | 0.792571049 | 0.018985307 |
| SQDG | AcCa | 0.44182139 | 0.273079281 |
| WE | AcCa | -0.843661514 | 0.008467857 |
| BisMePA | AcCa | -0.831487867 | 0.010501864 |
| LPE | AcCa | -0.688319303 | 0.059103849 |
| MePC | AcCa | -0.09181474 | 0.828812407 |
| PE | AcCa | -0.794948471 | 0.018375228 |
| PG | AcCa | -0.577047883 | 0.134226717 |
| PI | AcCa | -0.889046222 | 0.003136949 |
| PIP | AcCa | -0.919652172 | 0.00121988 |
| PS | AcCa | -0.907735246 | 0.001830206 |
| LBPA | AcCa | -0.706518192 | 0.050101624 |
| Cer | AcCa | -0.743547681 | 0.034471599 |
| CerG3GNAc2 | AcCa | -0.846501915 | 0.008032721 |
| CerPE | AcCa | -0.810702036 | 0.014641672 |
| phSM | AcCa | -0.275688269 | 0.508679063 |
| DG | AcCa | -0.799068999 | 0.01734717 |
| DGDG | AcCa | -0.497296372 | 0.209893006 |
| TG | AcCa | -0.884789396 | 0.003500379 |
| StE | AcCa | -0.783036242 | 0.021558474 |
| ZyE | AcCa | -0.631456153 | 0.093102314 |
| AcCa | OAHFA | 0.89711877 | 0.002516639 |
| OAHFA | OAHFA | 1 | 0 |
| dMePE | OAHFA | 0.812256619 | 0.014301733 |
| LdMePE | OAHFA | 0.498096136 | 0.209044326 |
| LPC | OAHFA | 0.714739742 | 0.046324276 |
| CL | OAHFA | 0.782332069 | 0.021756632 |
| PC | OAHFA | 0.692000398 | 0.057211023 |
| Pet | OAHFA | 0.605001084 | 0.11203517 |
| Hex1Cer | OAHFA | 0.787454931 | 0.020340654 |
| Hex2Cer | OAHFA | 0.862503889 | 0.005846764 |
| SM | OAHFA | 0.697110111 | 0.054644307 |
| SPH | OAHFA | 0.85766232 | 0.00646169 |
| MGDG | OAHFA | 0.680102314 | 0.063462061 |
| SQDG | OAHFA | 0.34069506 | 0.408907372 |
| WE | OAHFA | -0.820474163 | 0.01258737 |
| BisMePA | OAHFA | -0.731694505 | 0.039091525 |
| LPE | OAHFA | -0.586325542 | 0.126611467 |
| MePC | OAHFA | -0.124990964 | 0.768071379 |
| PE | OAHFA | -0.642851415 | 0.085562588 |
| PG | OAHFA | -0.328424936 | 0.427051457 |
| PI | OAHFA | -0.81758562 | 0.01317429 |
| PIP | OAHFA | -0.736316549 | 0.037247843 |
| PS | OAHFA | -0.840634115 | 0.008947845 |
| LBPA | OAHFA | -0.525989133 | 0.18057572 |
| Cer | OAHFA | -0.659722095 | 0.075073622 |
| CerG3GNAc2 | OAHFA | -0.723111484 | 0.04266002 |
| CerPE | OAHFA | -0.652691492 | 0.079347487 |
| phSM | OAHFA | -0.17179051 | 0.684174033 |
| DG | OAHFA | -0.670753961 | 0.068645496 |
| DGDG | OAHFA | -0.522073114 | 0.184439306 |
| TG | OAHFA | -0.805859562 | 0.015732974 |
| StE | OAHFA | -0.612706017 | 0.106314022 |
| ZyE | OAHFA | -0.506610048 | 0.200121246 |
| AcCa | dMePE | 0.884649417 | 0.003512769 |
| OAHFA | dMePE | 0.812256619 | 0.014301733 |
| dMePE | dMePE | 1 | 0 |
| LdMePE | dMePE | 0.580483434 | 0.131377795 |
| LPC | dMePE | 0.911647658 | 0.00161199 |
| CL | dMePE | 0.952549474 | 0.000257678 |
| PC | dMePE | 0.796860245 | 0.017893643 |
| Pet | dMePE | 0.81999305 | 0.012683957 |
| Hex1Cer | dMePE | 0.990582178 | 2.07357E-06 |
| Hex2Cer | dMePE | 0.893358548 | 0.002794598 |
| SM | dMePE | 0.847430123 | 0.00789368 |
| SPH | dMePE | 0.934193746 | 0.00067773 |
| MGDG | dMePE | 0.968891064 | 7.35203E-05 |
| SQDG | dMePE | 0.521841619 | 0.184669069 |
| WE | dMePE | -0.881047956 | 0.003841342 |
| BisMePA | dMePE | -0.670543823 | 0.068764783 |
| LPE | dMePE | -0.573222059 | 0.137439369 |
| MePC | dMePE | -0.084543269 | 0.8422351 |
| PE | dMePE | -0.626133512 | 0.096750612 |
| PG | dMePE | -0.404356592 | 0.320420197 |
| PI | dMePE | -0.8499783 | 0.007519891 |
| PIP | dMePE | -0.908325303 | 0.001796137 |
| PS | dMePE | -0.877990523 | 0.004135313 |
| LBPA | dMePE | -0.745351261 | 0.03379954 |
| Cer | dMePE | -0.504227171 | 0.202598057 |
| CerG3GNAc2 | dMePE | -0.783770173 | 0.021353141 |
| CerPE | dMePE | -0.685280955 | 0.060693897 |
| phSM | dMePE | -0.259109024 | 0.535477521 |
| DG | dMePE | -0.825714245 | 0.011565345 |
| DGDG | dMePE | -0.585092572 | 0.127609194 |
| TG | dMePE | -0.812326102 | 0.014286656 |
| StE | dMePE | -0.748030142 | 0.032816229 |
| ZyE | dMePE | -0.68831497 | 0.059106099 |
| AcCa | LdMePE | 0.725960694 | 0.041454425 |
| OAHFA | LdMePE | 0.498096136 | 0.209044326 |
| dMePE | LdMePE | 0.580483434 | 0.131377795 |
| LdMePE | LdMePE | 1 | 0 |
| LPC | LdMePE | 0.841231507 | 0.008851795 |
| CL | LdMePE | 0.437555682 | 0.278283884 |
| PC | LdMePE | 0.192448632 | 0.647969345 |
| Pet | LdMePE | 0.647680545 | 0.08247834 |
| Hex1Cer | LdMePE | 0.493682815 | 0.213749945 |
| Hex2Cer | LdMePE | 0.604504502 | 0.112409751 |
| SM | LdMePE | 0.832474486 | 0.010326593 |
| SPH | LdMePE | 0.450918189 | 0.262142629 |
| MGDG | LdMePE | 0.506505803 | 0.200229265 |
| SQDG | LdMePE | 0.639536369 | 0.087718003 |
| WE | LdMePE | -0.690616927 | 0.057918099 |
| BisMePA | LdMePE | -0.663974279 | 0.072555825 |
| LPE | LdMePE | -0.663306956 | 0.072947625 |
| MePC | LdMePE | 0.002580207 | 0.995162134 |
| PE | LdMePE | -0.69562815 | 0.055381483 |
| PG | LdMePE | -0.628389405 | 0.095194491 |
| PI | LdMePE | -0.795298388 | 0.018286484 |
| PIP | LdMePE | -0.689417852 | 0.058535127 |
| PS | LdMePE | -0.721915973 | 0.04317213 |
| LBPA | LdMePE | -0.76273401 | 0.02773214 |
| Cer | LdMePE | -0.712281078 | 0.047435221 |
| CerG3GNAc2 | LdMePE | -0.767951611 | 0.026053311 |
| CerPE | LdMePE | -0.907545464 | 0.001841252 |
| phSM | LdMePE | -0.483108583 | 0.225246065 |
| DG | LdMePE | -0.714547353 | 0.046410634 |
| DGDG | LdMePE | -0.294234732 | 0.479324262 |
| TG | LdMePE | -0.756297386 | 0.029893024 |
| StE | LdMePE | -0.806928129 | 0.015487918 |
| ZyE | LdMePE | -0.783038073 | 0.02155796 |
| AcCa | LPC | 0.896266261 | 0.00257801 |
| OAHFA | LPC | 0.714739742 | 0.046324276 |
| dMePE | LPC | 0.911647658 | 0.00161199 |
| LdMePE | LPC | 0.841231507 | 0.008851795 |
| LPC | LPC | 1 | 0 |
| CL | LPC | 0.783595103 | 0.021402009 |
| PC | LPC | 0.542942375 | 0.164355159 |
| Pet | LPC | 0.876665844 | 0.004267043 |
| Hex1Cer | LPC | 0.867970312 | 0.005199091 |
| Hex2Cer | LPC | 0.838965856 | 0.009219572 |
| SM | LPC | 0.974007314 | 4.30515E-05 |
| SPH | LPC | 0.787149642 | 0.020423379 |
| MGDG | LPC | 0.858719524 | 0.006324049 |
| SQDG | LPC | 0.658081682 | 0.076058438 |
| WE | LPC | -0.896690386 | 0.002547358 |
| BisMePA | LPC | -0.791096722 | 0.019369909 |
| LPE | LPC | -0.751068282 | 0.031722503 |
| MePC | LPC | -0.141638948 | 0.737957474 |
| PE | LPC | -0.786598788 | 0.020573174 |
| PG | LPC | -0.643103447 | 0.085399992 |
| PI | LPC | -0.915610205 | 0.001408993 |
| PIP | LPC | -0.942658459 | 0.000451316 |
| PS | LPC | -0.873948551 | 0.004545641 |
| LBPA | LPC | -0.835006959 | 0.009885227 |
| Cer | LPC | -0.700236096 | 0.053108683 |
| CerG3GNAc2 | LPC | -0.814270157 | 0.013868876 |
| CerPE | LPC | -0.85560972 | 0.006734365 |
| phSM | LPC | -0.379575117 | 0.353702095 |
| DG | LPC | -0.820148843 | 0.01265263 |
| DGDG | LPC | -0.60402706 | 0.112770564 |
| TG | LPC | -0.821187125 | 0.012445093 |
| StE | LPC | -0.846940861 | 0.007966776 |
| ZyE | LPC | -0.771026835 | 0.025093999 |
| AcCa | CL | 0.827557138 | 0.011218826 |
| OAHFA | CL | 0.782332069 | 0.021756632 |
| dMePE | CL | 0.952549474 | 0.000257678 |
| LdMePE | CL | 0.437555682 | 0.278283884 |
| LPC | CL | 0.783595103 | 0.021402009 |
| CL | CL | 1 | 0 |
| PC | CL | 0.878174832 | 0.004117195 |
| Pet | CL | 0.686176655 | 0.060222542 |
| Hex1Cer | CL | 0.955225732 | 0.000216933 |
| Hex2Cer | CL | 0.825084421 | 0.011685303 |
| SM | CL | 0.672913798 | 0.067426517 |
| SPH | CL | 0.915937935 | 0.001392994 |
| MGDG | CL | 0.961193476 | 0.000141882 |
| SQDG | CL | 0.309387198 | 0.455854327 |
| WE | CL | -0.778160822 | 0.022953665 |
| BisMePA | CL | -0.477790304 | 0.23114555 |
| LPE | CL | -0.35301866 | 0.39102647 |
| MePC | CL | 0.147569693 | 0.72729758 |
| PE | CL | -0.41669952 | 0.304420885 |
| PG | CL | -0.169346018 | 0.688494636 |
| PI | CL | -0.748402016 | 0.032681133 |
| PIP | CL | -0.800942074 | 0.016892034 |
| PS | CL | -0.840475701 | 0.008973426 |
| LBPA | CL | -0.67424606 | 0.066681033 |
| Cer | CL | -0.292990898 | 0.481271674 |
| CerG3GNAc2 | CL | -0.787277519 | 0.020388702 |
| CerPE | CL | -0.569399884 | 0.140691146 |
| phSM | CL | -0.200742547 | 0.633597276 |
| DG | CL | -0.838269347 | 0.009334553 |
| DGDG | CL | -0.374552002 | 0.360632656 |
| TG | CL | -0.800531387 | 0.016991178 |
| StE | CL | -0.679175022 | 0.063965481 |
| ZyE | CL | -0.662041116 | 0.073694234 |
| AcCa | PC | 0.562712075 | 0.146482324 |
| OAHFA | PC | 0.692000398 | 0.057211023 |
| dMePE | PC | 0.796860245 | 0.017893643 |
| LdMePE | PC | 0.192448632 | 0.647969345 |
| LPC | PC | 0.542942375 | 0.164355159 |
| CL | PC | 0.878174832 | 0.004117195 |
| PC | PC | 1 | 0 |
| Pet | PC | 0.469843279 | 0.240106714 |
| Hex1Cer | PC | 0.827223825 | 0.011281006 |
| Hex2Cer | PC | 0.776347166 | 0.023486603 |
| SM | PC | 0.395260404 | 0.332458721 |
| SPH | PC | 0.77600497 | 0.023588008 |
| MGDG | PC | 0.805869203 | 0.015730753 |
| SQDG | PC | 0.188264811 | 0.655255776 |
| WE | PC | -0.672030815 | 0.0679233 |
| BisMePA | PC | -0.212246162 | 0.613828622 |
| LPE | PC | -0.11136342 | 0.792913549 |
| MePC | PC | 0.211386637 | 0.615298861 |
| PE | PC | -0.104507038 | 0.805471376 |
| PG | PC | 0.212886554 | 0.612733944 |
| PI | PC | -0.623794224 | 0.098379603 |
| PIP | PC | -0.487790186 | 0.220117841 |
| PS | PC | -0.637750818 | 0.088891857 |
| LBPA | PC | -0.563824157 | 0.145510395 |
| Cer | PC | -0.015896408 | 0.970199256 |
| CerG3GNAc2 | PC | -0.562158631 | 0.146967348 |
| CerPE | PC | -0.393398185 | 0.334948929 |
| phSM | PC | -0.240735842 | 0.565756521 |
| DG | PC | -0.726251059 | 0.041332738 |
| DGDG | PC | -0.310063855 | 0.454817339 |
| TG | PC | -0.659935879 | 0.074945832 |
| StE | PC | -0.534694375 | 0.172143902 |
| ZyE | PC | -0.631322978 | 0.093192611 |
| AcCa | Pet | 0.791651698 | 0.019224569 |
| OAHFA | Pet | 0.605001084 | 0.11203517 |
| dMePE | Pet | 0.81999305 | 0.012683957 |
| LdMePE | Pet | 0.647680545 | 0.08247834 |
| LPC | Pet | 0.876665844 | 0.004267043 |
| CL | Pet | 0.686176655 | 0.060222542 |
| PC | Pet | 0.469843279 | 0.240106714 |
| Pet | Pet | 1 | 0 |
| Hex1Cer | Pet | 0.76574561 | 0.026755223 |
| Hex2Cer | Pet | 0.851241587 | 0.00733885 |
| SM | Pet | 0.889660401 | 0.003086623 |
| SPH | Pet | 0.775328929 | 0.023789142 |
| MGDG | Pet | 0.746088855 | 0.033527024 |
| SQDG | Pet | 0.54264826 | 0.164629542 |
| WE | Pet | -0.711710395 | 0.047695356 |
| BisMePA | Pet | -0.829920567 | 0.010784147 |
| LPE | Pet | -0.625988368 | 0.09685123 |
| MePC | Pet | -0.380615082 | 0.352274884 |
| PE | Pet | -0.81025822 | 0.014739644 |
| PG | Pet | -0.652255536 | 0.079617068 |
| PI | Pet | -0.845440478 | 0.008193619 |
| PIP | Pet | -0.844143006 | 0.008393065 |
| PS | Pet | -0.592275495 | 0.121858384 |
| LBPA | Pet | -0.870867481 | 0.004875377 |
| Cer | Pet | -0.593986707 | 0.1205103 |
| CerG3GNAc2 | Pet | -0.49711162 | 0.210089313 |
| CerPE | Pet | -0.818145207 | 0.013059269 |
| phSM | Pet | -0.598960602 | 0.116639813 |
| DG | Pet | -0.767316715 | 0.026254143 |
| DGDG | Pet | -0.652246671 | 0.079622555 |
| TG | Pet | -0.744304373 | 0.034188651 |
| StE | Pet | -0.87012228 | 0.004957367 |
| ZyE | Pet | -0.650091742 | 0.080962995 |
| AcCa | Hex1Cer | 0.834581865 | 0.009958461 |
| OAHFA | Hex1Cer | 0.787454931 | 0.020340654 |
| dMePE | Hex1Cer | 0.990582178 | 2.07357E-06 |
| LdMePE | Hex1Cer | 0.493682815 | 0.213749945 |
| LPC | Hex1Cer | 0.867970312 | 0.005199091 |
| CL | Hex1Cer | 0.955225732 | 0.000216933 |
| PC | Hex1Cer | 0.827223825 | 0.011281006 |
| Pet | Hex1Cer | 0.76574561 | 0.026755223 |
| Hex1Cer | Hex1Cer | 1 | 0 |
| Hex2Cer | Hex1Cer | 0.853411814 | 0.007034375 |
| SM | Hex1Cer | 0.79419113 | 0.018568221 |
| SPH | Hex1Cer | 0.907718555 | 0.001831175 |
| MGDG | Hex1Cer | 0.978310738 | 2.50947E-05 |
| SQDG | Hex1Cer | 0.465473636 | 0.245107947 |
| WE | Hex1Cer | -0.877435408 | 0.004190192 |
| BisMePA | Hex1Cer | -0.60692353 | 0.11059172 |
| LPE | Hex1Cer | -0.552455496 | 0.15561436 |
| MePC | Hex1Cer | -0.056488566 | 0.89430904 |
| PE | Hex1Cer | -0.556297499 | 0.152158092 |
| PG | Hex1Cer | -0.338708385 | 0.411822277 |
| PI | Hex1Cer | -0.801580222 | 0.016738698 |
| PIP | Hex1Cer | -0.883399285 | 0.003624679 |
| PS | Hex1Cer | -0.860122307 | 0.006144331 |
| LBPA | Hex1Cer | -0.68045456 | 0.063271448 |
| Cer | Hex1Cer | -0.442842032 | 0.271841177 |
| CerG3GNAc2 | Hex1Cer | -0.750244662 | 0.03201676 |
| CerPE | Hex1Cer | -0.592161563 | 0.121948439 |
| phSM | Hex1Cer | -0.167534063 | 0.691702001 |
| DG | Hex1Cer | -0.768992671 | 0.02572606 |
| DGDG | Hex1Cer | -0.607304905 | 0.110306632 |
| TG | Hex1Cer | -0.738499032 | 0.036396077 |
| StE | Hex1Cer | -0.66928877 | 0.069479775 |
| ZyE | Hex1Cer | -0.637840023 | 0.088832997 |
| AcCa | Hex2Cer | 0.851262033 | 0.007335943 |
| OAHFA | Hex2Cer | 0.862503889 | 0.005846764 |
| dMePE | Hex2Cer | 0.893358548 | 0.002794598 |
| LdMePE | Hex2Cer | 0.604504502 | 0.112409751 |
| LPC | Hex2Cer | 0.838965856 | 0.009219572 |
| CL | Hex2Cer | 0.825084421 | 0.011685303 |
| PC | Hex2Cer | 0.776347166 | 0.023486603 |
| Pet | Hex2Cer | 0.851241587 | 0.00733885 |
| Hex1Cer | Hex2Cer | 0.853411814 | 0.007034375 |
| Hex2Cer | Hex2Cer | 1 | 0 |
| SM | Hex2Cer | 0.795569041 | 0.018218027 |
| SPH | Hex2Cer | 0.8917857 | 0.002916507 |
| MGDG | Hex2Cer | 0.787012427 | 0.020460628 |
| SQDG | Hex2Cer | 0.491099952 | 0.216529184 |
| WE | Hex2Cer | -0.839558691 | 0.009122419 |
| BisMePA | Hex2Cer | -0.736483764 | 0.037182158 |
| LPE | Hex2Cer | -0.530149797 | 0.176518712 |
| MePC | Hex2Cer | -0.189687059 | 0.652776128 |
| PE | Hex2Cer | -0.65450895 | 0.078229383 |
| PG | Hex2Cer | -0.341938772 | 0.407087098 |
| PI | Hex2Cer | -0.933697139 | 0.000692925 |
| PIP | Hex2Cer | -0.756934614 | 0.029674633 |
| PS | Hex2Cer | -0.744781586 | 0.034010941 |
| LBPA | Hex2Cer | -0.842490037 | 0.008651597 |
| Cer | Hex2Cer | -0.538094182 | 0.168909767 |
| CerG3GNAc2 | Hex2Cer | -0.639897336 | 0.087481795 |
| CerPE | Hex2Cer | -0.826731036 | 0.011373334 |
| phSM | Hex2Cer | -0.563752241 | 0.145573139 |
| DG | Hex2Cer | -0.866732873 | 0.00534145 |
| DGDG | Hex2Cer | -0.582883107 | 0.129408082 |
| TG | Hex2Cer | -0.89300367 | 0.00282181 |
| StE | Hex2Cer | -0.866390267 | 0.005381301 |
| ZyE | Hex2Cer | -0.761384392 | 0.028176968 |
| AcCa | SM | 0.882640851 | 0.003693679 |
| OAHFA | SM | 0.697110111 | 0.054644307 |
| dMePE | SM | 0.847430123 | 0.00789368 |
| LdMePE | SM | 0.832474486 | 0.010326593 |
| LPC | SM | 0.974007314 | 4.30515E-05 |
| CL | SM | 0.672913798 | 0.067426517 |
| PC | SM | 0.395260404 | 0.332458721 |
| Pet | SM | 0.889660401 | 0.003086623 |
| Hex1Cer | SM | 0.79419113 | 0.018568221 |
| Hex2Cer | SM | 0.795569041 | 0.018218027 |
| SM | SM | 1 | 0 |
| SPH | SM | 0.749750497 | 0.032194112 |
| MGDG | SM | 0.759229693 | 0.028896212 |
| SQDG | SM | 0.709572962 | 0.048677295 |
| WE | SM | -0.848342673 | 0.00775849 |
| BisMePA | SM | -0.892027701 | 0.00289753 |
| LPE | SM | -0.83451321 | 0.009970321 |
| MePC | SM | -0.330706359 | 0.423652553 |
| PE | SM | -0.900687401 | 0.002270024 |
| PG | SM | -0.788655167 | 0.02001745 |
| PI | SM | -0.877821384 | 0.004151985 |
| PIP | SM | -0.942621797 | 0.00045217 |
| PS | SM | -0.810290857 | 0.014732426 |
| LBPA | SM | -0.764629036 | 0.027114901 |
| Cer | SM | -0.817442371 | 0.013203837 |
| CerG3GNAc2 | SM | -0.725158419 | 0.041791775 |
| CerPE | SM | -0.841174999 | 0.008860852 |
| phSM | SM | -0.35190554 | 0.392627221 |
| DG | SM | -0.709283334 | 0.048811278 |
| DGDG | SM | -0.679565267 | 0.063753333 |
| TG | SM | -0.753728352 | 0.030783496 |
| StE | SM | -0.792858937 | 0.018910768 |
| ZyE | SM | -0.646017726 | 0.083532908 |
| AcCa | SPH | 0.868777513 | 0.005107554 |
| OAHFA | SPH | 0.85766232 | 0.00646169 |
| dMePE | SPH | 0.934193746 | 0.00067773 |
| LdMePE | SPH | 0.450918189 | 0.262142629 |
| LPC | SPH | 0.787149642 | 0.020423379 |
| CL | SPH | 0.915937935 | 0.001392994 |
| PC | SPH | 0.77600497 | 0.023588008 |
| Pet | SPH | 0.775328929 | 0.023789142 |
| Hex1Cer | SPH | 0.907718555 | 0.001831175 |
| Hex2Cer | SPH | 0.8917857 | 0.002916507 |
| SM | SPH | 0.749750497 | 0.032194112 |
| SPH | SPH | 1 | 0 |
| MGDG | SPH | 0.858231675 | 0.006387328 |
| SQDG | SPH | 0.50146865 | 0.205485317 |
| WE | SPH | -0.722078618 | 0.043102241 |
| BisMePA | SPH | -0.67294877 | 0.067406885 |
| LPE | SPH | -0.416396449 | 0.304809051 |
| MePC | SPH | -0.200563884 | 0.633905837 |
| PE | SPH | -0.619908507 | 0.101120042 |
| PG | SPH | -0.359841787 | 0.381277288 |
| PI | SPH | -0.755930024 | 0.030019374 |
| PIP | SPH | -0.807732695 | 0.015304996 |
| PS | SPH | -0.777873382 | 0.023037623 |
| LBPA | SPH | -0.653057405 | 0.079121631 |
| Cer | SPH | -0.468931479 | 0.241145984 |
| CerG3GNAc2 | SPH | -0.687098922 | 0.059739488 |
| CerPE | SPH | -0.635256594 | 0.090546754 |
| phSM | SPH | -0.291476148 | 0.483647441 |
| DG | SPH | -0.783052405 | 0.021553939 |
| DGDG | SPH | -0.465719528 | 0.244825125 |
| TG | SPH | -0.834740284 | 0.009931129 |
| StE | SPH | -0.694150221 | 0.056122542 |
| ZyE | SPH | -0.550599883 | 0.157298891 |
| AcCa | MGDG | 0.792571049 | 0.018985307 |
| OAHFA | MGDG | 0.680102314 | 0.063462061 |
| dMePE | MGDG | 0.968891064 | 7.35203E-05 |
| LdMePE | MGDG | 0.506505803 | 0.200229265 |
| LPC | MGDG | 0.858719524 | 0.006324049 |
| CL | MGDG | 0.961193476 | 0.000141882 |
| PC | MGDG | 0.805869203 | 0.015730753 |
| Pet | MGDG | 0.746088855 | 0.033527024 |
| Hex1Cer | MGDG | 0.978310738 | 2.50947E-05 |
| Hex2Cer | MGDG | 0.787012427 | 0.020460628 |
| SM | MGDG | 0.759229693 | 0.028896212 |
| SPH | MGDG | 0.858231675 | 0.006387328 |
| MGDG | MGDG | 1 | 0 |
| SQDG | MGDG | 0.422631259 | 0.296871518 |
| WE | MGDG | -0.822689022 | 0.012148711 |
| BisMePA | MGDG | -0.507287454 | 0.199420064 |
| LPE | MGDG | -0.468150303 | 0.242038183 |
| MePC | MGDG | 0.076214783 | 0.857649703 |
| PE | MGDG | -0.472953974 | 0.236578332 |
| PG | MGDG | -0.294509769 | 0.47889407 |
| PI | MGDG | -0.755613549 | 0.030128485 |
| PIP | MGDG | -0.865890319 | 0.005439795 |
| PS | MGDG | -0.837905509 | 0.009394976 |
| LBPA | MGDG | -0.708019679 | 0.049398446 |
| Cer | MGDG | -0.336632078 | 0.414878178 |
| CerG3GNAc2 | MGDG | -0.772175823 | 0.024741274 |
| CerPE | MGDG | -0.574692455 | 0.136199637 |
| phSM | MGDG | -0.18183447 | 0.666500993 |
| DG | MGDG | -0.801282806 | 0.016810053 |
| DGDG | MGDG | -0.491824742 | 0.215747404 |
| TG | MGDG | -0.724978796 | 0.041867532 |
| StE | MGDG | -0.68109983 | 0.06292315 |
| ZyE | MGDG | -0.680861793 | 0.063051503 |
| AcCa | SQDG | 0.44182139 | 0.273079281 |
| OAHFA | SQDG | 0.34069506 | 0.408907372 |
| dMePE | SQDG | 0.521841619 | 0.184669069 |
| LdMePE | SQDG | 0.639536369 | 0.087718003 |
| LPC | SQDG | 0.658081682 | 0.076058438 |
| CL | SQDG | 0.309387198 | 0.455854327 |
| PC | SQDG | 0.188264811 | 0.655255776 |
| Pet | SQDG | 0.54264826 | 0.164629542 |
| Hex1Cer | SQDG | 0.465473636 | 0.245107947 |
| Hex2Cer | SQDG | 0.491099952 | 0.216529184 |
| SM | SQDG | 0.709572962 | 0.048677295 |
| SPH | SQDG | 0.50146865 | 0.205485317 |
| MGDG | SQDG | 0.422631259 | 0.296871518 |
| SQDG | SQDG | 1 | 0 |
| WE | SQDG | -0.460614935 | 0.250730226 |
| BisMePA | SQDG | -0.554552758 | 0.153722393 |
| LPE | SQDG | -0.485436415 | 0.222688536 |
| MePC | SQDG | -0.502420201 | 0.204486935 |
| PE | SQDG | -0.616739027 | 0.10338735 |
| PG | SQDG | -0.611302711 | 0.107343317 |
| PI | SQDG | -0.472870961 | 0.236672145 |
| PIP | SQDG | -0.523142185 | 0.18338021 |
| PS | SQDG | -0.473168929 | 0.236335497 |
| LBPA | SQDG | -0.462479248 | 0.24856531 |
| Cer | SQDG | -0.556497977 | 0.151978909 |
| CerG3GNAc2 | SQDG | -0.432731368 | 0.284228211 |
| CerPE | SQDG | -0.556682872 | 0.151813756 |
| phSM | SQDG | -0.289887471 | 0.48614409 |
| DG | SQDG | -0.394658532 | 0.333262612 |
| DGDG | SQDG | -0.409212906 | 0.314078774 |
| TG | SQDG | -0.469086661 | 0.240968946 |
| StE | SQDG | -0.468091448 | 0.242105471 |
| ZyE | SQDG | -0.418319151 | 0.302350519 |
| AcCa | WE | -0.843661514 | 0.008467857 |
| OAHFA | WE | -0.820474163 | 0.01258737 |
| dMePE | WE | -0.881047956 | 0.003841342 |
| LdMePE | WE | -0.690616927 | 0.057918099 |
| LPC | WE | -0.896690386 | 0.002547358 |
| CL | WE | -0.778160822 | 0.022953665 |
| PC | WE | -0.672030815 | 0.0679233 |
| Pet | WE | -0.711710395 | 0.047695356 |
| Hex1Cer | WE | -0.877435408 | 0.004190192 |
| Hex2Cer | WE | -0.839558691 | 0.009122419 |
| SM | WE | -0.848342673 | 0.00775849 |
| SPH | WE | -0.722078618 | 0.043102241 |
| MGDG | WE | -0.822689022 | 0.012148711 |
| SQDG | WE | -0.460614935 | 0.250730226 |
| WE | WE | 1 | 0 |
| BisMePA | WE | 0.709987917 | 0.048485721 |
| LPE | WE | 0.790037058 | 0.019649318 |
| MePC | WE | 0.041018657 | 0.923176243 |
| PE | WE | 0.651108962 | 0.080328621 |
| PG | WE | 0.430766529 | 0.28666682 |
| PI | WE | 0.920766219 | 0.001170844 |
| PIP | WE | 0.85532653 | 0.006772552 |
| PS | WE | 0.90046888 | 0.002284653 |
| LBPA | WE | 0.697064375 | 0.05466697 |
| Cer | WE | 0.668040686 | 0.070195126 |
| CerG3GNAc2 | WE | 0.779956529 | 0.022433463 |
| CerPE | WE | 0.724248731 | 0.0421763 |
| phSM | WE | 0.203827479 | 0.628276726 |
| DG | WE | 0.71448368 | 0.046439236 |
| DGDG | WE | 0.713876224 | 0.046712646 |
| TG | WE | 0.725308389 | 0.041728588 |
| StE | WE | 0.70392372 | 0.051330776 |
| ZyE | WE | 0.715369021 | 0.046042486 |
| AcCa | BisMePA | -0.831487867 | 0.010501864 |
| OAHFA | BisMePA | -0.731694505 | 0.039091525 |
| dMePE | BisMePA | -0.670543823 | 0.068764783 |
| LdMePE | BisMePA | -0.663974279 | 0.072555825 |
| LPC | BisMePA | -0.791096722 | 0.019369909 |
| CL | BisMePA | -0.477790304 | 0.23114555 |
| PC | BisMePA | -0.212246162 | 0.613828622 |
| Pet | BisMePA | -0.829920567 | 0.010784147 |
| Hex1Cer | BisMePA | -0.60692353 | 0.11059172 |
| Hex2Cer | BisMePA | -0.736483764 | 0.037182158 |
| SM | BisMePA | -0.892027701 | 0.00289753 |
| SPH | BisMePA | -0.67294877 | 0.067406885 |
| MGDG | BisMePA | -0.507287454 | 0.199420064 |
| SQDG | BisMePA | -0.554552758 | 0.153722393 |
| WE | BisMePA | 0.709987917 | 0.048485721 |
| BisMePA | BisMePA | 1 | 0 |
| LPE | BisMePA | 0.855335813 | 0.006771298 |
| MePC | BisMePA | 0.569912044 | 0.140252972 |
| PE | BisMePA | 0.985837526 | 7.0264E-06 |
| PG | BisMePA | 0.846372714 | 0.008052197 |
| PI | BisMePA | 0.789896496 | 0.019686569 |
| PIP | BisMePA | 0.823369526 | 0.012015903 |
| PS | BisMePA | 0.627992566 | 0.095467179 |
| LBPA | BisMePA | 0.589992582 | 0.123669999 |
| Cer | BisMePA | 0.921758801 | 0.001128254 |
| CerG3GNAc2 | BisMePA | 0.48919908 | 0.218586492 |
| CerPE | BisMePA | 0.759030144 | 0.028963388 |
| phSM | BisMePA | 0.327835129 | 0.427932024 |
| DG | BisMePA | 0.505758242 | 0.20100479 |
| DGDG | BisMePA | 0.740765606 | 0.035524187 |
| TG | BisMePA | 0.638786505 | 0.088209876 |
| StE | BisMePA | 0.663677134 | 0.072730132 |
| ZyE | BisMePA | 0.38251172 | 0.349678807 |
| AcCa | LPE | -0.688319303 | 0.059103849 |
| OAHFA | LPE | -0.586325542 | 0.126611467 |
| dMePE | LPE | -0.573222059 | 0.137439369 |
| LdMePE | LPE | -0.663306956 | 0.072947625 |
| LPC | LPE | -0.751068282 | 0.031722503 |
| CL | LPE | -0.35301866 | 0.39102647 |
| PC | LPE | -0.11136342 | 0.792913549 |
| Pet | LPE | -0.625988368 | 0.09685123 |
| Hex1Cer | LPE | -0.552455496 | 0.15561436 |
| Hex2Cer | LPE | -0.530149797 | 0.176518712 |
| SM | LPE | -0.83451321 | 0.009970321 |
| SPH | LPE | -0.416396449 | 0.304809051 |
| MGDG | LPE | -0.468150303 | 0.242038183 |
| SQDG | LPE | -0.485436415 | 0.222688536 |
| WE | LPE | 0.790037058 | 0.019649318 |
| BisMePA | LPE | 0.855335813 | 0.006771298 |
| LPE | LPE | 1 | 0 |
| MePC | LPE | 0.405083454 | 0.319467235 |
| PE | LPE | 0.856479306 | 0.006617966 |
| PG | LPE | 0.80652712 | 0.015579599 |
| PI | LPE | 0.708174318 | 0.049326365 |
| PIP | LPE | 0.787738535 | 0.020263993 |
| PS | LPE | 0.65887878 | 0.075578963 |
| LBPA | LPE | 0.425284593 | 0.293524211 |
| Cer | LPE | 0.915978034 | 0.001391045 |
| CerG3GNAc2 | LPE | 0.507291892 | 0.199415474 |
| CerPE | LPE | 0.592624415 | 0.121582821 |
| phSM | LPE | 0.027748638 | 0.947998004 |
| DG | LPE | 0.308834615 | 0.456701883 |
| DGDG | LPE | 0.82696617 | 0.01132922 |
| TG | LPE | 0.396520271 | 0.330778911 |
| StE | LPE | 0.45952534 | 0.251999889 |
| ZyE | LPE | 0.331343745 | 0.422705016 |
| AcCa | MePC | -0.09181474 | 0.828812407 |
| OAHFA | MePC | -0.124990964 | 0.768071379 |
| dMePE | MePC | -0.084543269 | 0.8422351 |
| LdMePE | MePC | 0.002580207 | 0.995162134 |
| LPC | MePC | -0.141638948 | 0.737957474 |
| CL | MePC | 0.147569693 | 0.72729758 |
| PC | MePC | 0.211386637 | 0.615298861 |
| Pet | MePC | -0.380615082 | 0.352274884 |
| Hex1Cer | MePC | -0.056488566 | 0.89430904 |
| Hex2Cer | MePC | -0.189687059 | 0.652776128 |
| SM | MePC | -0.330706359 | 0.423652553 |
| SPH | MePC | -0.200563884 | 0.633905837 |
| MGDG | MePC | 0.076214783 | 0.857649703 |
| SQDG | MePC | -0.502420201 | 0.204486935 |
| WE | MePC | 0.041018657 | 0.923176243 |
| BisMePA | MePC | 0.569912044 | 0.140252972 |
| LPE | MePC | 0.405083454 | 0.319467235 |
| MePC | MePC | 1 | 0 |
| PE | MePC | 0.592912039 | 0.121355931 |
| PG | MePC | 0.615816899 | 0.104052406 |
| PI | MePC | 0.084444329 | 0.842417972 |
| PIP | MePC | 0.197445221 | 0.639299339 |
| PS | MePC | -0.129270764 | 0.760304073 |
| LBPA | MePC | -0.004675579 | 0.991233417 |
| Cer | MePC | 0.482988079 | 0.22537887 |
| CerG3GNAc2 | MePC | -0.314833465 | 0.447535223 |
| CerPE | MePC | 0.09958369 | 0.814511363 |
| phSM | MePC | 0.112056556 | 0.791646154 |
| DG | MePC | -0.201474246 | 0.632334072 |
| DGDG | MePC | 0.606641223 | 0.110803022 |
| TG | MePC | -0.070649474 | 0.867972371 |
| StE | MePC | 0.015220462 | 0.97146604 |
| ZyE | MePC | -0.289023035 | 0.487504687 |
| AcCa | PE | -0.794948471 | 0.018375228 |
| OAHFA | PE | -0.642851415 | 0.085562588 |
| dMePE | PE | -0.626133512 | 0.096750612 |
| LdMePE | PE | -0.69562815 | 0.055381483 |
| LPC | PE | -0.786598788 | 0.020573174 |
| CL | PE | -0.41669952 | 0.304420885 |
| PC | PE | -0.104507038 | 0.805471376 |
| Pet | PE | -0.81025822 | 0.014739644 |
| Hex1Cer | PE | -0.556297499 | 0.152158092 |
| Hex2Cer | PE | -0.65450895 | 0.078229383 |
| SM | PE | -0.900687401 | 0.002270024 |
| SPH | PE | -0.619908507 | 0.101120042 |
| MGDG | PE | -0.472953974 | 0.236578332 |
| SQDG | PE | -0.616739027 | 0.10338735 |
| WE | PE | 0.651108962 | 0.080328621 |
| BisMePA | PE | 0.985837526 | 7.0264E-06 |
| LPE | PE | 0.856479306 | 0.006617966 |
| MePC | PE | 0.592912039 | 0.121355931 |
| PE | PE | 1 | 0 |
| PG | PE | 0.919773708 | 0.001214466 |
| PI | PE | 0.728619045 | 0.040348443 |
| PIP | PE | 0.820622612 | 0.012557662 |
| PS | PE | 0.600388264 | 0.11554203 |
| LBPA | PE | 0.556582016 | 0.151903831 |
| Cer | PE | 0.932068807 | 0.000744311 |
| CerG3GNAc2 | PE | 0.48292775 | 0.225445372 |
| CerPE | PE | 0.738182048 | 0.036519042 |
| phSM | PE | 0.294188931 | 0.479395915 |
| DG | PE | 0.458398658 | 0.253316161 |
| DGDG | PE | 0.697098901 | 0.054649862 |
| TG | PE | 0.591005455 | 0.122864375 |
| StE | PE | 0.62898265 | 0.09478768 |
| ZyE | PE | 0.343328761 | 0.405056881 |
| AcCa | PG | -0.577047883 | 0.134226717 |
| OAHFA | PG | -0.328424936 | 0.427051457 |
| dMePE | PG | -0.404356592 | 0.320420197 |
| LdMePE | PG | -0.628389405 | 0.095194491 |
| LPC | PG | -0.643103447 | 0.085399992 |
| CL | PG | -0.169346018 | 0.688494636 |
| PC | PG | 0.212886554 | 0.612733944 |
| Pet | PG | -0.652255536 | 0.079617068 |
| Hex1Cer | PG | -0.338708385 | 0.411822277 |
| Hex2Cer | PG | -0.341938772 | 0.407087098 |
| SM | PG | -0.788655167 | 0.02001745 |
| SPH | PG | -0.359841787 | 0.381277288 |
| MGDG | PG | -0.294509769 | 0.47889407 |
| SQDG | PG | -0.611302711 | 0.107343317 |
| WE | PG | 0.430766529 | 0.28666682 |
| BisMePA | PG | 0.846372714 | 0.008052197 |
| LPE | PG | 0.80652712 | 0.015579599 |
| MePC | PG | 0.615816899 | 0.104052406 |
| PE | PG | 0.919773708 | 0.001214466 |
| PG | PG | 1 | 0 |
| PI | PG | 0.473170951 | 0.236333213 |
| PIP | PG | 0.704370418 | 0.051117873 |
| PS | PG | 0.415004449 | 0.306594939 |
| LBPA | PG | 0.360097974 | 0.380913359 |
| Cer | PG | 0.859700101 | 0.006198073 |
| CerG3GNAc2 | PG | 0.334819009 | 0.417554541 |
| CerPE | PG | 0.545955359 | 0.161558631 |
| phSM | PG | 0.127031421 | 0.764366061 |
| DG | PG | 0.210802381 | 0.616298885 |
| DGDG | PG | 0.587031853 | 0.126041892 |
| TG | PG | 0.32124672 | 0.437820014 |
| StE | PG | 0.414697101 | 0.306989929 |
| ZyE | PG | 0.138083847 | 0.744365042 |
| AcCa | PI | -0.889046222 | 0.003136949 |
| OAHFA | PI | -0.81758562 | 0.01317429 |
| dMePE | PI | -0.8499783 | 0.007519891 |
| LdMePE | PI | -0.795298388 | 0.018286484 |
| LPC | PI | -0.915610205 | 0.001408993 |
| CL | PI | -0.748402016 | 0.032681133 |
| PC | PI | -0.623794224 | 0.098379603 |
| Pet | PI | -0.845440478 | 0.008193619 |
| Hex1Cer | PI | -0.801580222 | 0.016738698 |
| Hex2Cer | PI | -0.933697139 | 0.000692925 |
| SM | PI | -0.877821384 | 0.004151985 |
| SPH | PI | -0.755930024 | 0.030019374 |
| MGDG | PI | -0.755613549 | 0.030128485 |
| SQDG | PI | -0.472870961 | 0.236672145 |
| WE | PI | 0.920766219 | 0.001170844 |
| BisMePA | PI | 0.789896496 | 0.019686569 |
| LPE | PI | 0.708174318 | 0.049326365 |
| MePC | PI | 0.084444329 | 0.842417972 |
| PE | PI | 0.728619045 | 0.040348443 |
| PG | PI | 0.473170951 | 0.236333213 |
| PI | PI | 1 | 0 |
| PIP | PI | 0.821063932 | 0.012469604 |
| PS | PI | 0.818151973 | 0.013057883 |
| LBPA | PI | 0.88082727 | 0.003862094 |
| Cer | PI | 0.678622975 | 0.064266303 |
| CerG3GNAc2 | PI | 0.739300611 | 0.036086255 |
| CerPE | PI | 0.918130448 | 0.001288997 |
| phSM | PI | 0.536887203 | 0.170054137 |
| DG | PI | 0.861760075 | 0.005938685 |
| DGDG | PI | 0.605863954 | 0.111385977 |
| TG | PI | 0.881039978 | 0.003842091 |
| StE | PI | 0.908385639 | 0.001792677 |
| ZyE | PI | 0.835401188 | 0.009817617 |
| AcCa | PIP | -0.919652172 | 0.00121988 |
| OAHFA | PIP | -0.736316549 | 0.037247843 |
| dMePE | PIP | -0.908325303 | 0.001796137 |
| LdMePE | PIP | -0.689417852 | 0.058535127 |
| LPC | PIP | -0.942658459 | 0.000451316 |
| CL | PIP | -0.800942074 | 0.016892034 |
| PC | PIP | -0.487790186 | 0.220117841 |
| Pet | PIP | -0.844143006 | 0.008393065 |
| Hex1Cer | PIP | -0.883399285 | 0.003624679 |
| Hex2Cer | PIP | -0.756934614 | 0.029674633 |
| SM | PIP | -0.942621797 | 0.00045217 |
| SPH | PIP | -0.807732695 | 0.015304996 |
| MGDG | PIP | -0.865890319 | 0.005439795 |
| SQDG | PIP | -0.523142185 | 0.18338021 |
| WE | PIP | 0.85532653 | 0.006772552 |
| BisMePA | PIP | 0.823369526 | 0.012015903 |
| LPE | PIP | 0.787738535 | 0.020263993 |
| MePC | PIP | 0.197445221 | 0.639299339 |
| PE | PIP | 0.820622612 | 0.012557662 |
| PG | PIP | 0.704370418 | 0.051117873 |
| PI | PIP | 0.821063932 | 0.012469604 |
| PIP | PIP | 1 | 0 |
| PS | PIP | 0.867217167 | 0.005285441 |
| LBPA | PIP | 0.673003888 | 0.067375951 |
| Cer | PIP | 0.727696547 | 0.040730183 |
| CerG3GNAc2 | PIP | 0.774324369 | 0.024089973 |
| CerPE | PIP | 0.703647803 | 0.051462547 |
| phSM | PIP | 0.15087183 | 0.721378744 |
| DG | PIP | 0.691210633 | 0.057614028 |
| DGDG | PIP | 0.656450724 | 0.077045041 |
| TG | PIP | 0.713169229 | 0.047032078 |
| StE | PIP | 0.699433598 | 0.053500407 |
| ZyE | PIP | 0.556218801 | 0.152228462 |
| AcCa | PS | -0.907735246 | 0.001830206 |
| OAHFA | PS | -0.840634115 | 0.008947845 |
| dMePE | PS | -0.877990523 | 0.004135313 |
| LdMePE | PS | -0.721915973 | 0.04317213 |
| LPC | PS | -0.873948551 | 0.004545641 |
| CL | PS | -0.840475701 | 0.008973426 |
| PC | PS | -0.637750818 | 0.088891857 |
| Pet | PS | -0.592275495 | 0.121858384 |
| Hex1Cer | PS | -0.860122307 | 0.006144331 |
| Hex2Cer | PS | -0.744781586 | 0.034010941 |
| SM | PS | -0.810290857 | 0.014732426 |
| SPH | PS | -0.777873382 | 0.023037623 |
| MGDG | PS | -0.837905509 | 0.009394976 |
| SQDG | PS | -0.473168929 | 0.236335497 |
| WE | PS | 0.90046888 | 0.002284653 |
| BisMePA | PS | 0.627992566 | 0.095467179 |
| LPE | PS | 0.65887878 | 0.075578963 |
| MePC | PS | -0.129270764 | 0.760304073 |
| PE | PS | 0.600388264 | 0.11554203 |
| PG | PS | 0.415004449 | 0.306594939 |
| PI | PS | 0.818151973 | 0.013057883 |
| PIP | PS | 0.867217167 | 0.005285441 |
| PS | PS | 1 | 0 |
| LBPA | PS | 0.596154654 | 0.118814524 |
| Cer | PS | 0.639235026 | 0.087915477 |
| CerG3GNAc2 | PS | 0.95986514 | 0.000156798 |
| CerPE | PS | 0.683443196 | 0.061667853 |
| phSM | PS | 0.054557493 | 0.897907509 |
| DG | PS | 0.742341808 | 0.034925461 |
| DGDG | PS | 0.431836782 | 0.285337242 |
| TG | PS | 0.797575849 | 0.017715432 |
| StE | PS | 0.645389846 | 0.083933142 |
| ZyE | PS | 0.665448549 | 0.071694645 |
| AcCa | LBPA | -0.706518192 | 0.050101624 |
| OAHFA | LBPA | -0.525989133 | 0.18057572 |
| dMePE | LBPA | -0.745351261 | 0.03379954 |
| LdMePE | LBPA | -0.76273401 | 0.02773214 |
| LPC | LBPA | -0.835006959 | 0.009885227 |
| CL | LBPA | -0.67424606 | 0.066681033 |
| PC | LBPA | -0.563824157 | 0.145510395 |
| Pet | LBPA | -0.870867481 | 0.004875377 |
| Hex1Cer | LBPA | -0.68045456 | 0.063271448 |
| Hex2Cer | LBPA | -0.842490037 | 0.008651597 |
| SM | LBPA | -0.764629036 | 0.027114901 |
| SPH | LBPA | -0.653057405 | 0.079121631 |
| MGDG | LBPA | -0.708019679 | 0.049398446 |
| SQDG | LBPA | -0.462479248 | 0.24856531 |
| WE | LBPA | 0.697064375 | 0.05466697 |
| BisMePA | LBPA | 0.589992582 | 0.123669999 |
| LPE | LBPA | 0.425284593 | 0.293524211 |
| MePC | LBPA | -0.004675579 | 0.991233417 |
| PE | LBPA | 0.556582016 | 0.151903831 |
| PG | LBPA | 0.360097974 | 0.380913359 |
| PI | LBPA | 0.88082727 | 0.003862094 |
| PIP | LBPA | 0.673003888 | 0.067375951 |
| PS | LBPA | 0.596154654 | 0.118814524 |
| LBPA | LBPA | 1 | 0 |
| Cer | LBPA | 0.389622276 | 0.340024692 |
| CerG3GNAc2 | LBPA | 0.596321954 | 0.118684225 |
| CerPE | LBPA | 0.911770062 | 0.001605452 |
| phSM | LBPA | 0.791480608 | 0.019269302 |
| DG | LBPA | 0.928078555 | 0.000880622 |
| DGDG | LBPA | 0.372757364 | 0.363123581 |
| TG | LBPA | 0.848932025 | 0.00767197 |
| StE | LBPA | 0.983626249 | 1.08402E-05 |
| ZyE | LBPA | 0.923144695 | 0.001070498 |
| AcCa | Cer | -0.743547681 | 0.034471599 |
| OAHFA | Cer | -0.659722095 | 0.075073622 |
| dMePE | Cer | -0.504227171 | 0.202598057 |
| LdMePE | Cer | -0.712281078 | 0.047435221 |
| LPC | Cer | -0.700236096 | 0.053108683 |
| CL | Cer | -0.292990898 | 0.481271674 |
| PC | Cer | -0.015896408 | 0.970199256 |
| Pet | Cer | -0.593986707 | 0.1205103 |
| Hex1Cer | Cer | -0.442842032 | 0.271841177 |
| Hex2Cer | Cer | -0.538094182 | 0.168909767 |
| SM | Cer | -0.817442371 | 0.013203837 |
| SPH | Cer | -0.468931479 | 0.241145984 |
| MGDG | Cer | -0.336632078 | 0.414878178 |
| SQDG | Cer | -0.556497977 | 0.151978909 |
| WE | Cer | 0.668040686 | 0.070195126 |
| BisMePA | Cer | 0.921758801 | 0.001128254 |
| LPE | Cer | 0.915978034 | 0.001391045 |
| MePC | Cer | 0.482988079 | 0.22537887 |
| PE | Cer | 0.932068807 | 0.000744311 |
| PG | Cer | 0.859700101 | 0.006198073 |
| PI | Cer | 0.678622975 | 0.064266303 |
| PIP | Cer | 0.727696547 | 0.040730183 |
| PS | Cer | 0.639235026 | 0.087915477 |
| LBPA | Cer | 0.389622276 | 0.340024692 |
| Cer | Cer | 1 | 0 |
| CerG3GNAc2 | Cer | 0.52771691 | 0.178884985 |
| CerPE | Cer | 0.668136695 | 0.070139944 |
| phSM | Cer | 0.1098322 | 0.795714779 |
| DG | Cer | 0.324913133 | 0.432305734 |
| DGDG | Cer | 0.652538508 | 0.079442026 |
| TG | Cer | 0.507531887 | 0.199167369 |
| StE | Cer | 0.484824128 | 0.22335978 |
| ZyE | Cer | 0.278778541 | 0.503741257 |
| AcCa | CerG3GNAc2 | -0.846501915 | 0.008032721 |
| OAHFA | CerG3GNAc2 | -0.723111484 | 0.04266002 |
| dMePE | CerG3GNAc2 | -0.783770173 | 0.021353141 |
| LdMePE | CerG3GNAc2 | -0.767951611 | 0.026053311 |
| LPC | CerG3GNAc2 | -0.814270157 | 0.013868876 |
| CL | CerG3GNAc2 | -0.787277519 | 0.020388702 |
| PC | CerG3GNAc2 | -0.562158631 | 0.146967348 |
| Pet | CerG3GNAc2 | -0.49711162 | 0.210089313 |
| Hex1Cer | CerG3GNAc2 | -0.750244662 | 0.03201676 |
| Hex2Cer | CerG3GNAc2 | -0.639897336 | 0.087481795 |
| SM | CerG3GNAc2 | -0.725158419 | 0.041791775 |
| SPH | CerG3GNAc2 | -0.687098922 | 0.059739488 |
| MGDG | CerG3GNAc2 | -0.772175823 | 0.024741274 |
| SQDG | CerG3GNAc2 | -0.432731368 | 0.284228211 |
| WE | CerG3GNAc2 | 0.779956529 | 0.022433463 |
| BisMePA | CerG3GNAc2 | 0.48919908 | 0.218586492 |
| LPE | CerG3GNAc2 | 0.507291892 | 0.199415474 |
| MePC | CerG3GNAc2 | -0.314833465 | 0.447535223 |
| PE | CerG3GNAc2 | 0.48292775 | 0.225445372 |
| PG | CerG3GNAc2 | 0.334819009 | 0.417554541 |
| PI | CerG3GNAc2 | 0.739300611 | 0.036086255 |
| PIP | CerG3GNAc2 | 0.774324369 | 0.024089973 |
| PS | CerG3GNAc2 | 0.95986514 | 0.000156798 |
| LBPA | CerG3GNAc2 | 0.596321954 | 0.118684225 |
| Cer | CerG3GNAc2 | 0.52771691 | 0.178884985 |
| CerG3GNAc2 | CerG3GNAc2 | 1 | 0 |
| CerPE | CerG3GNAc2 | 0.685457684 | 0.060600721 |
| phSM | CerG3GNAc2 | 0.09789813 | 0.817610459 |
| DG | CerG3GNAc2 | 0.773189148 | 0.024432758 |
| DGDG | CerG3GNAc2 | 0.184325381 | 0.662138383 |
| TG | CerG3GNAc2 | 0.812323827 | 0.01428715 |
| StE | CerG3GNAc2 | 0.651255762 | 0.080237312 |
| ZyE | CerG3GNAc2 | 0.712410168 | 0.047376496 |
| AcCa | CerPE | -0.810702036 | 0.014641672 |
| OAHFA | CerPE | -0.652691492 | 0.079347487 |
| dMePE | CerPE | -0.685280955 | 0.060693897 |
| LdMePE | CerPE | -0.907545464 | 0.001841252 |
| LPC | CerPE | -0.85560972 | 0.006734365 |
| CL | CerPE | -0.569399884 | 0.140691146 |
| PC | CerPE | -0.393398185 | 0.334948929 |
| Pet | CerPE | -0.818145207 | 0.013059269 |
| Hex1Cer | CerPE | -0.592161563 | 0.121948439 |
| Hex2Cer | CerPE | -0.826731036 | 0.011373334 |
| SM | CerPE | -0.841174999 | 0.008860852 |
| SPH | CerPE | -0.635256594 | 0.090546754 |
| MGDG | CerPE | -0.574692455 | 0.136199637 |
| SQDG | CerPE | -0.556682872 | 0.151813756 |
| WE | CerPE | 0.724248731 | 0.0421763 |
| BisMePA | CerPE | 0.759030144 | 0.028963388 |
| LPE | CerPE | 0.592624415 | 0.121582821 |
| MePC | CerPE | 0.09958369 | 0.814511363 |
| PE | CerPE | 0.738182048 | 0.036519042 |
| PG | CerPE | 0.545955359 | 0.161558631 |
| PI | CerPE | 0.918130448 | 0.001288997 |
| PIP | CerPE | 0.703647803 | 0.051462547 |
| PS | CerPE | 0.683443196 | 0.061667853 |
| LBPA | CerPE | 0.911770062 | 0.001605452 |
| Cer | CerPE | 0.668136695 | 0.070139944 |
| CerG3GNAc2 | CerPE | 0.685457684 | 0.060600721 |
| CerPE | CerPE | 1 | 0 |
| phSM | CerPE | 0.717555948 | 0.045071247 |
| DG | CerPE | 0.860072009 | 0.006150717 |
| DGDG | CerPE | 0.377592906 | 0.356429704 |
| TG | CerPE | 0.898923984 | 0.002389827 |
| StE | CerPE | 0.959776118 | 0.000157833 |
| ZyE | CerPE | 0.849788531 | 0.007547331 |
| AcCa | phSM | -0.275688269 | 0.508679063 |
| OAHFA | phSM | -0.17179051 | 0.684174033 |
| dMePE | phSM | -0.259109024 | 0.535477521 |
| LdMePE | phSM | -0.483108583 | 0.225246065 |
| LPC | phSM | -0.379575117 | 0.353702095 |
| CL | phSM | -0.200742547 | 0.633597276 |
| PC | phSM | -0.240735842 | 0.565756521 |
| Pet | phSM | -0.598960602 | 0.116639813 |
| Hex1Cer | phSM | -0.167534063 | 0.691702001 |
| Hex2Cer | phSM | -0.563752241 | 0.145573139 |
| SM | phSM | -0.35190554 | 0.392627221 |
| SPH | phSM | -0.291476148 | 0.483647441 |
| MGDG | phSM | -0.18183447 | 0.666500993 |
| SQDG | phSM | -0.289887471 | 0.48614409 |
| WE | phSM | 0.203827479 | 0.628276726 |
| BisMePA | phSM | 0.327835129 | 0.427932024 |
| LPE | phSM | 0.027748638 | 0.947998004 |
| MePC | phSM | 0.112056556 | 0.791646154 |
| PE | phSM | 0.294188931 | 0.479395915 |
| PG | phSM | 0.127031421 | 0.764366061 |
| PI | phSM | 0.536887203 | 0.170054137 |
| PIP | phSM | 0.15087183 | 0.721378744 |
| PS | phSM | 0.054557493 | 0.897907509 |
| LBPA | phSM | 0.791480608 | 0.019269302 |
| Cer | phSM | 0.1098322 | 0.795714779 |
| CerG3GNAc2 | phSM | 0.09789813 | 0.817610459 |
| CerPE | phSM | 0.717555948 | 0.045071247 |
| phSM | phSM | 1 | 0 |
| DG | phSM | 0.64399714 | 0.08482488 |
| DGDG | phSM | 0.065329889 | 0.877854547 |
| TG | phSM | 0.586817736 | 0.126214406 |
| StE | phSM | 0.781474891 | 0.021999371 |
| ZyE | phSM | 0.678568334 | 0.064296123 |
| AcCa | DG | -0.799068999 | 0.01734717 |
| OAHFA | DG | -0.670753961 | 0.068645496 |
| dMePE | DG | -0.825714245 | 0.011565345 |
| LdMePE | DG | -0.714547353 | 0.046410634 |
| LPC | DG | -0.820148843 | 0.01265263 |
| CL | DG | -0.838269347 | 0.009334553 |
| PC | DG | -0.726251059 | 0.041332738 |
| Pet | DG | -0.767316715 | 0.026254143 |
| Hex1Cer | DG | -0.768992671 | 0.02572606 |
| Hex2Cer | DG | -0.866732873 | 0.00534145 |
| SM | DG | -0.709283334 | 0.048811278 |
| SPH | DG | -0.783052405 | 0.021553939 |
| MGDG | DG | -0.801282806 | 0.016810053 |
| SQDG | DG | -0.394658532 | 0.333262612 |
| WE | DG | 0.71448368 | 0.046439236 |
| BisMePA | DG | 0.505758242 | 0.20100479 |
| LPE | DG | 0.308834615 | 0.456701883 |
| MePC | DG | -0.201474246 | 0.632334072 |
| PE | DG | 0.458398658 | 0.253316161 |
| PG | DG | 0.210802381 | 0.616298885 |
| PI | DG | 0.861760075 | 0.005938685 |
| PIP | DG | 0.691210633 | 0.057614028 |
| PS | DG | 0.742341808 | 0.034925461 |
| LBPA | DG | 0.928078555 | 0.000880622 |
| Cer | DG | 0.324913133 | 0.432305734 |
| CerG3GNAc2 | DG | 0.773189148 | 0.024432758 |
| CerPE | DG | 0.860072009 | 0.006150717 |
| phSM | DG | 0.64399714 | 0.08482488 |
| DG | DG | 1 | 0 |
| DGDG | DG | 0.209282753 | 0.618902322 |
| TG | DG | 0.952132322 | 0.00026445 |
| StE | DG | 0.941382721 | 0.000481644 |
| ZyE | DG | 0.922644505 | 0.001091115 |
| AcCa | DGDG | -0.497296372 | 0.209893006 |
| OAHFA | DGDG | -0.522073114 | 0.184439306 |
| dMePE | DGDG | -0.585092572 | 0.127609194 |
| LdMePE | DGDG | -0.294234732 | 0.479324262 |
| LPC | DGDG | -0.60402706 | 0.112770564 |
| CL | DGDG | -0.374552002 | 0.360632656 |
| PC | DGDG | -0.310063855 | 0.454817339 |
| Pet | DGDG | -0.652246671 | 0.079622555 |
| Hex1Cer | DGDG | -0.607304905 | 0.110306632 |
| Hex2Cer | DGDG | -0.582883107 | 0.129408082 |
| SM | DGDG | -0.679565267 | 0.063753333 |
| SPH | DGDG | -0.465719528 | 0.244825125 |
| MGDG | DGDG | -0.491824742 | 0.215747404 |
| SQDG | DGDG | -0.409212906 | 0.314078774 |
| WE | DGDG | 0.713876224 | 0.046712646 |
| BisMePA | DGDG | 0.740765606 | 0.035524187 |
| LPE | DGDG | 0.82696617 | 0.01132922 |
| MePC | DGDG | 0.606641223 | 0.110803022 |
| PE | DGDG | 0.697098901 | 0.054649862 |
| PG | DGDG | 0.587031853 | 0.126041892 |
| PI | DGDG | 0.605863954 | 0.111385977 |
| PIP | DGDG | 0.656450724 | 0.077045041 |
| PS | DGDG | 0.431836782 | 0.285337242 |
| LBPA | DGDG | 0.372757364 | 0.363123581 |
| Cer | DGDG | 0.652538508 | 0.079442026 |
| CerG3GNAc2 | DGDG | 0.184325381 | 0.662138383 |
| CerPE | DGDG | 0.377592906 | 0.356429704 |
| phSM | DGDG | 0.065329889 | 0.877854547 |
| DG | DGDG | 0.209282753 | 0.618902322 |
| DGDG | DGDG | 1 | 0 |
| TG | DGDG | 0.231986758 | 0.580379147 |
| StE | DGDG | 0.346185531 | 0.400898078 |
| ZyE | DGDG | 0.204229121 | 0.62758504 |
| AcCa | TG | -0.884789396 | 0.003500379 |
| OAHFA | TG | -0.805859562 | 0.015732974 |
| dMePE | TG | -0.812326102 | 0.014286656 |
| LdMePE | TG | -0.756297386 | 0.029893024 |
| LPC | TG | -0.821187125 | 0.012445093 |
| CL | TG | -0.800531387 | 0.016991178 |
| PC | TG | -0.659935879 | 0.074945832 |
| Pet | TG | -0.744304373 | 0.034188651 |
| Hex1Cer | TG | -0.738499032 | 0.036396077 |
| Hex2Cer | TG | -0.89300367 | 0.00282181 |
| SM | TG | -0.753728352 | 0.030783496 |
| SPH | TG | -0.834740284 | 0.009931129 |
| MGDG | TG | -0.724978796 | 0.041867532 |
| SQDG | TG | -0.469086661 | 0.240968946 |
| WE | TG | 0.725308389 | 0.041728588 |
| BisMePA | TG | 0.638786505 | 0.088209876 |
| LPE | TG | 0.396520271 | 0.330778911 |
| MePC | TG | -0.070649474 | 0.867972371 |
| PE | TG | 0.591005455 | 0.122864375 |
| PG | TG | 0.32124672 | 0.437820014 |
| PI | TG | 0.881039978 | 0.003842091 |
| PIP | TG | 0.713169229 | 0.047032078 |
| PS | TG | 0.797575849 | 0.017715432 |
| LBPA | TG | 0.848932025 | 0.00767197 |
| Cer | TG | 0.507531887 | 0.199167369 |
| CerG3GNAc2 | TG | 0.812323827 | 0.01428715 |
| CerPE | TG | 0.898923984 | 0.002389827 |
| phSM | TG | 0.586817736 | 0.126214406 |
| DG | TG | 0.952132322 | 0.00026445 |
| DGDG | TG | 0.231986758 | 0.580379147 |
| TG | TG | 1 | 0 |
| StE | TG | 0.911701544 | 0.00160911 |
| ZyE | TG | 0.835460168 | 0.009807527 |
| AcCa | StE | -0.783036242 | 0.021558474 |
| OAHFA | StE | -0.612706017 | 0.106314022 |
| dMePE | StE | -0.748030142 | 0.032816229 |
| LdMePE | StE | -0.806928129 | 0.015487918 |
| LPC | StE | -0.846940861 | 0.007966776 |
| CL | StE | -0.679175022 | 0.063965481 |
| PC | StE | -0.534694375 | 0.172143902 |
| Pet | StE | -0.87012228 | 0.004957367 |
| Hex1Cer | StE | -0.66928877 | 0.069479775 |
| Hex2Cer | StE | -0.866390267 | 0.005381301 |
| SM | StE | -0.792858937 | 0.018910768 |
| SPH | StE | -0.694150221 | 0.056122542 |
| MGDG | StE | -0.68109983 | 0.06292315 |
| SQDG | StE | -0.468091448 | 0.242105471 |
| WE | StE | 0.70392372 | 0.051330776 |
| BisMePA | StE | 0.663677134 | 0.072730132 |
| LPE | StE | 0.45952534 | 0.251999889 |
| MePC | StE | 0.015220462 | 0.97146604 |
| PE | StE | 0.62898265 | 0.09478768 |
| PG | StE | 0.414697101 | 0.306989929 |
| PI | StE | 0.908385639 | 0.001792677 |
| PIP | StE | 0.699433598 | 0.053500407 |
| PS | StE | 0.645389846 | 0.083933142 |
| LBPA | StE | 0.983626249 | 1.08402E-05 |
| Cer | StE | 0.484824128 | 0.22335978 |
| CerG3GNAc2 | StE | 0.651255762 | 0.080237312 |
| CerPE | StE | 0.959776118 | 0.000157833 |
| phSM | StE | 0.781474891 | 0.021999371 |
| DG | StE | 0.941382721 | 0.000481644 |
| DGDG | StE | 0.346185531 | 0.400898078 |
| TG | StE | 0.911701544 | 0.00160911 |
| StE | StE | 1 | 0 |
| ZyE | StE | 0.902912313 | 0.002124517 |
| AcCa | ZyE | -0.631456153 | 0.093102314 |
| OAHFA | ZyE | -0.506610048 | 0.200121246 |
| dMePE | ZyE | -0.68831497 | 0.059106099 |
| LdMePE | ZyE | -0.783038073 | 0.02155796 |
| LPC | ZyE | -0.771026835 | 0.025093999 |
| CL | ZyE | -0.662041116 | 0.073694234 |
| PC | ZyE | -0.631322978 | 0.093192611 |
| Pet | ZyE | -0.650091742 | 0.080962995 |
| Hex1Cer | ZyE | -0.637840023 | 0.088832997 |
| Hex2Cer | ZyE | -0.761384392 | 0.028176968 |
| SM | ZyE | -0.646017726 | 0.083532908 |
| SPH | ZyE | -0.550599883 | 0.157298891 |
| MGDG | ZyE | -0.680861793 | 0.063051503 |
| SQDG | ZyE | -0.418319151 | 0.302350519 |
| WE | ZyE | 0.715369021 | 0.046042486 |
| BisMePA | ZyE | 0.38251172 | 0.349678807 |
| LPE | ZyE | 0.331343745 | 0.422705016 |
| MePC | ZyE | -0.289023035 | 0.487504687 |
| PE | ZyE | 0.343328761 | 0.405056881 |
| PG | ZyE | 0.138083847 | 0.744365042 |
| PI | ZyE | 0.835401188 | 0.009817617 |
| PIP | ZyE | 0.556218801 | 0.152228462 |
| PS | ZyE | 0.665448549 | 0.071694645 |
| LBPA | ZyE | 0.923144695 | 0.001070498 |
| Cer | ZyE | 0.278778541 | 0.503741257 |
| CerG3GNAc2 | ZyE | 0.712410168 | 0.047376496 |
| CerPE | ZyE | 0.849788531 | 0.007547331 |
| phSM | ZyE | 0.678568334 | 0.064296123 |
| DG | ZyE | 0.922644505 | 0.001091115 |
| DGDG | ZyE | 0.204229121 | 0.62758504 |
| TG | ZyE | 0.835460168 | 0.009807527 |
| StE | ZyE | 0.902912313 | 0.002124517 |
| ZyE | ZyE | 1 | 0 |
